# Supplementary material for: Functional gradients in the human lateral prefrontal cortex revealed by a comprehensive coordinate-based meta-analysis
Source: eLife journal article supplement (doi:10.7554/elife.76926), 2022-09-28
Supplement: supp [file elife-76926-supp-v1.zip]

Single-Subject Principal LPFC Gradients (11 subjects)

Subject 1

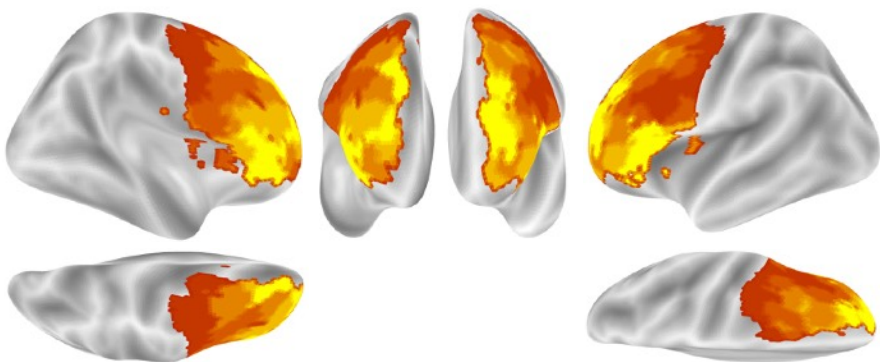

Subject 4

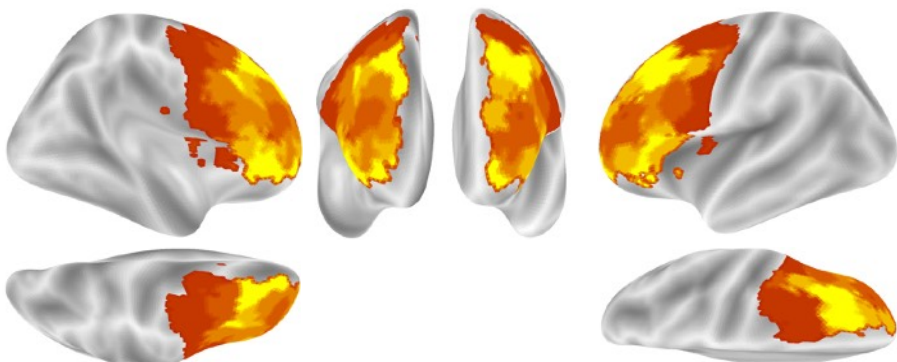

Subject 5

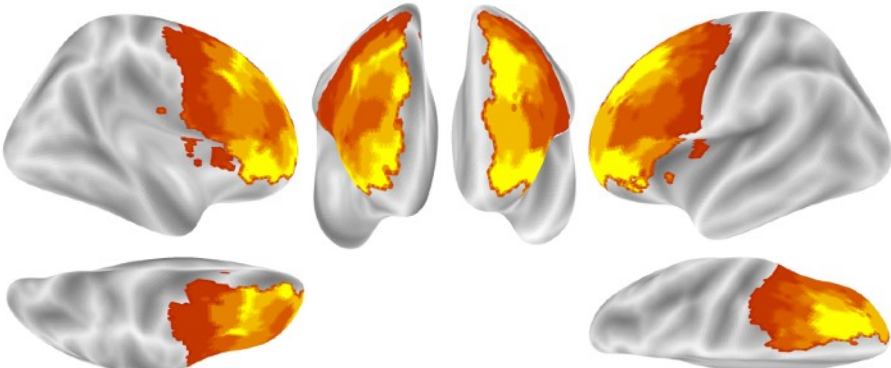

Subject 6

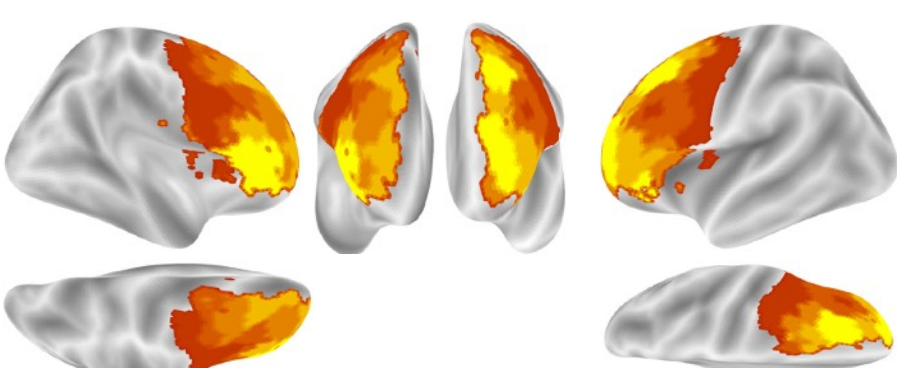

Subject 7

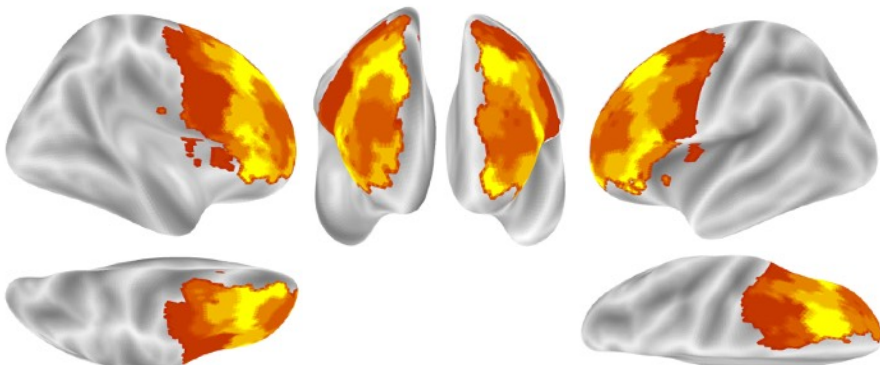

Subject 9

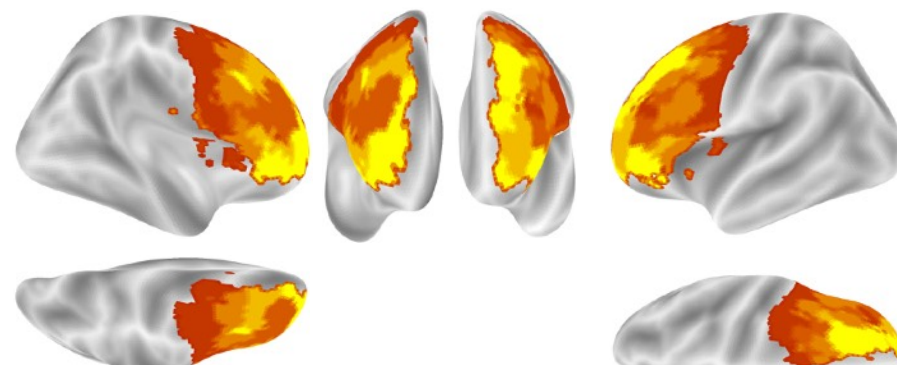

Subject 11

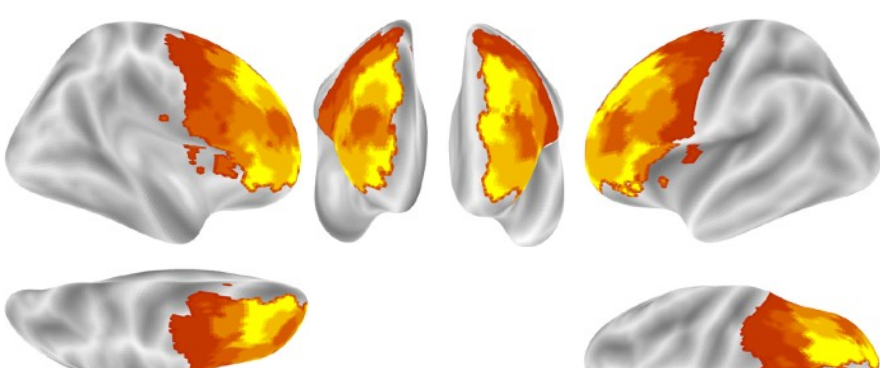

Subject 12

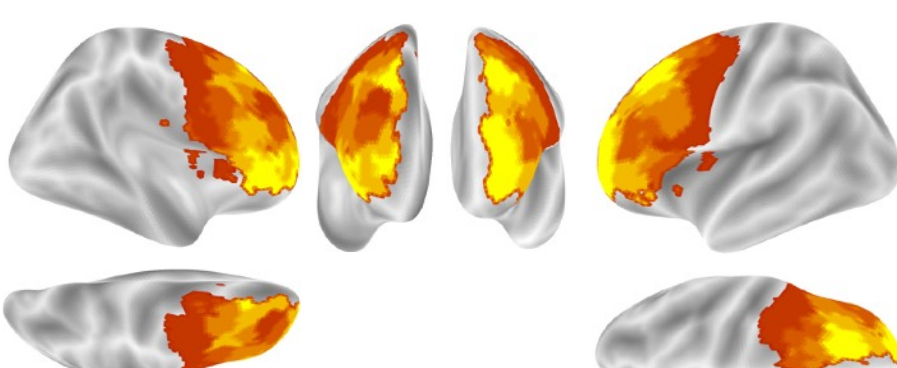

Subject 13

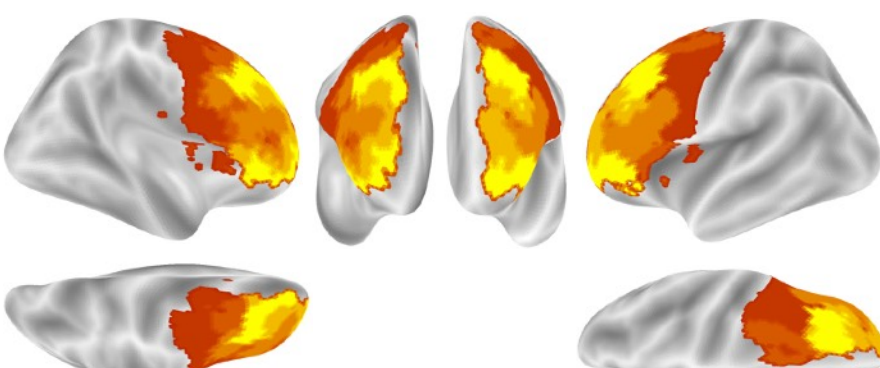

Subject 14

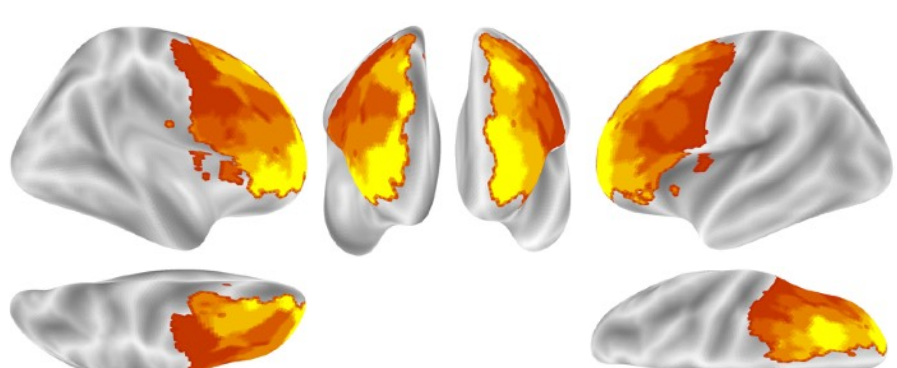

Subject 15

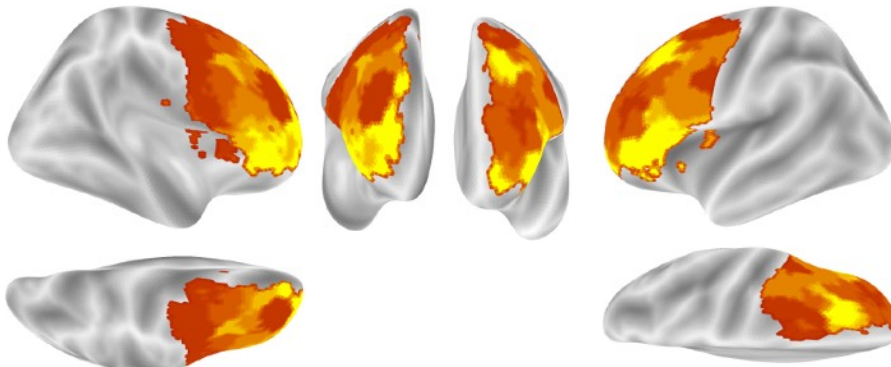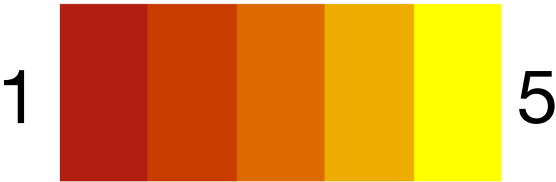

Quintile along the gradient
