# Supplementary material for: Functional gradients in the human lateral prefrontal cortex revealed by a comprehensive coordinate-based meta-analysis
Source: eLife journal article supplement (doi:10.7554/elife.76926), 2022-09-28

# Pearson Correlation Between the Subject-Level and Literature-Level Principal LPFC Gradients

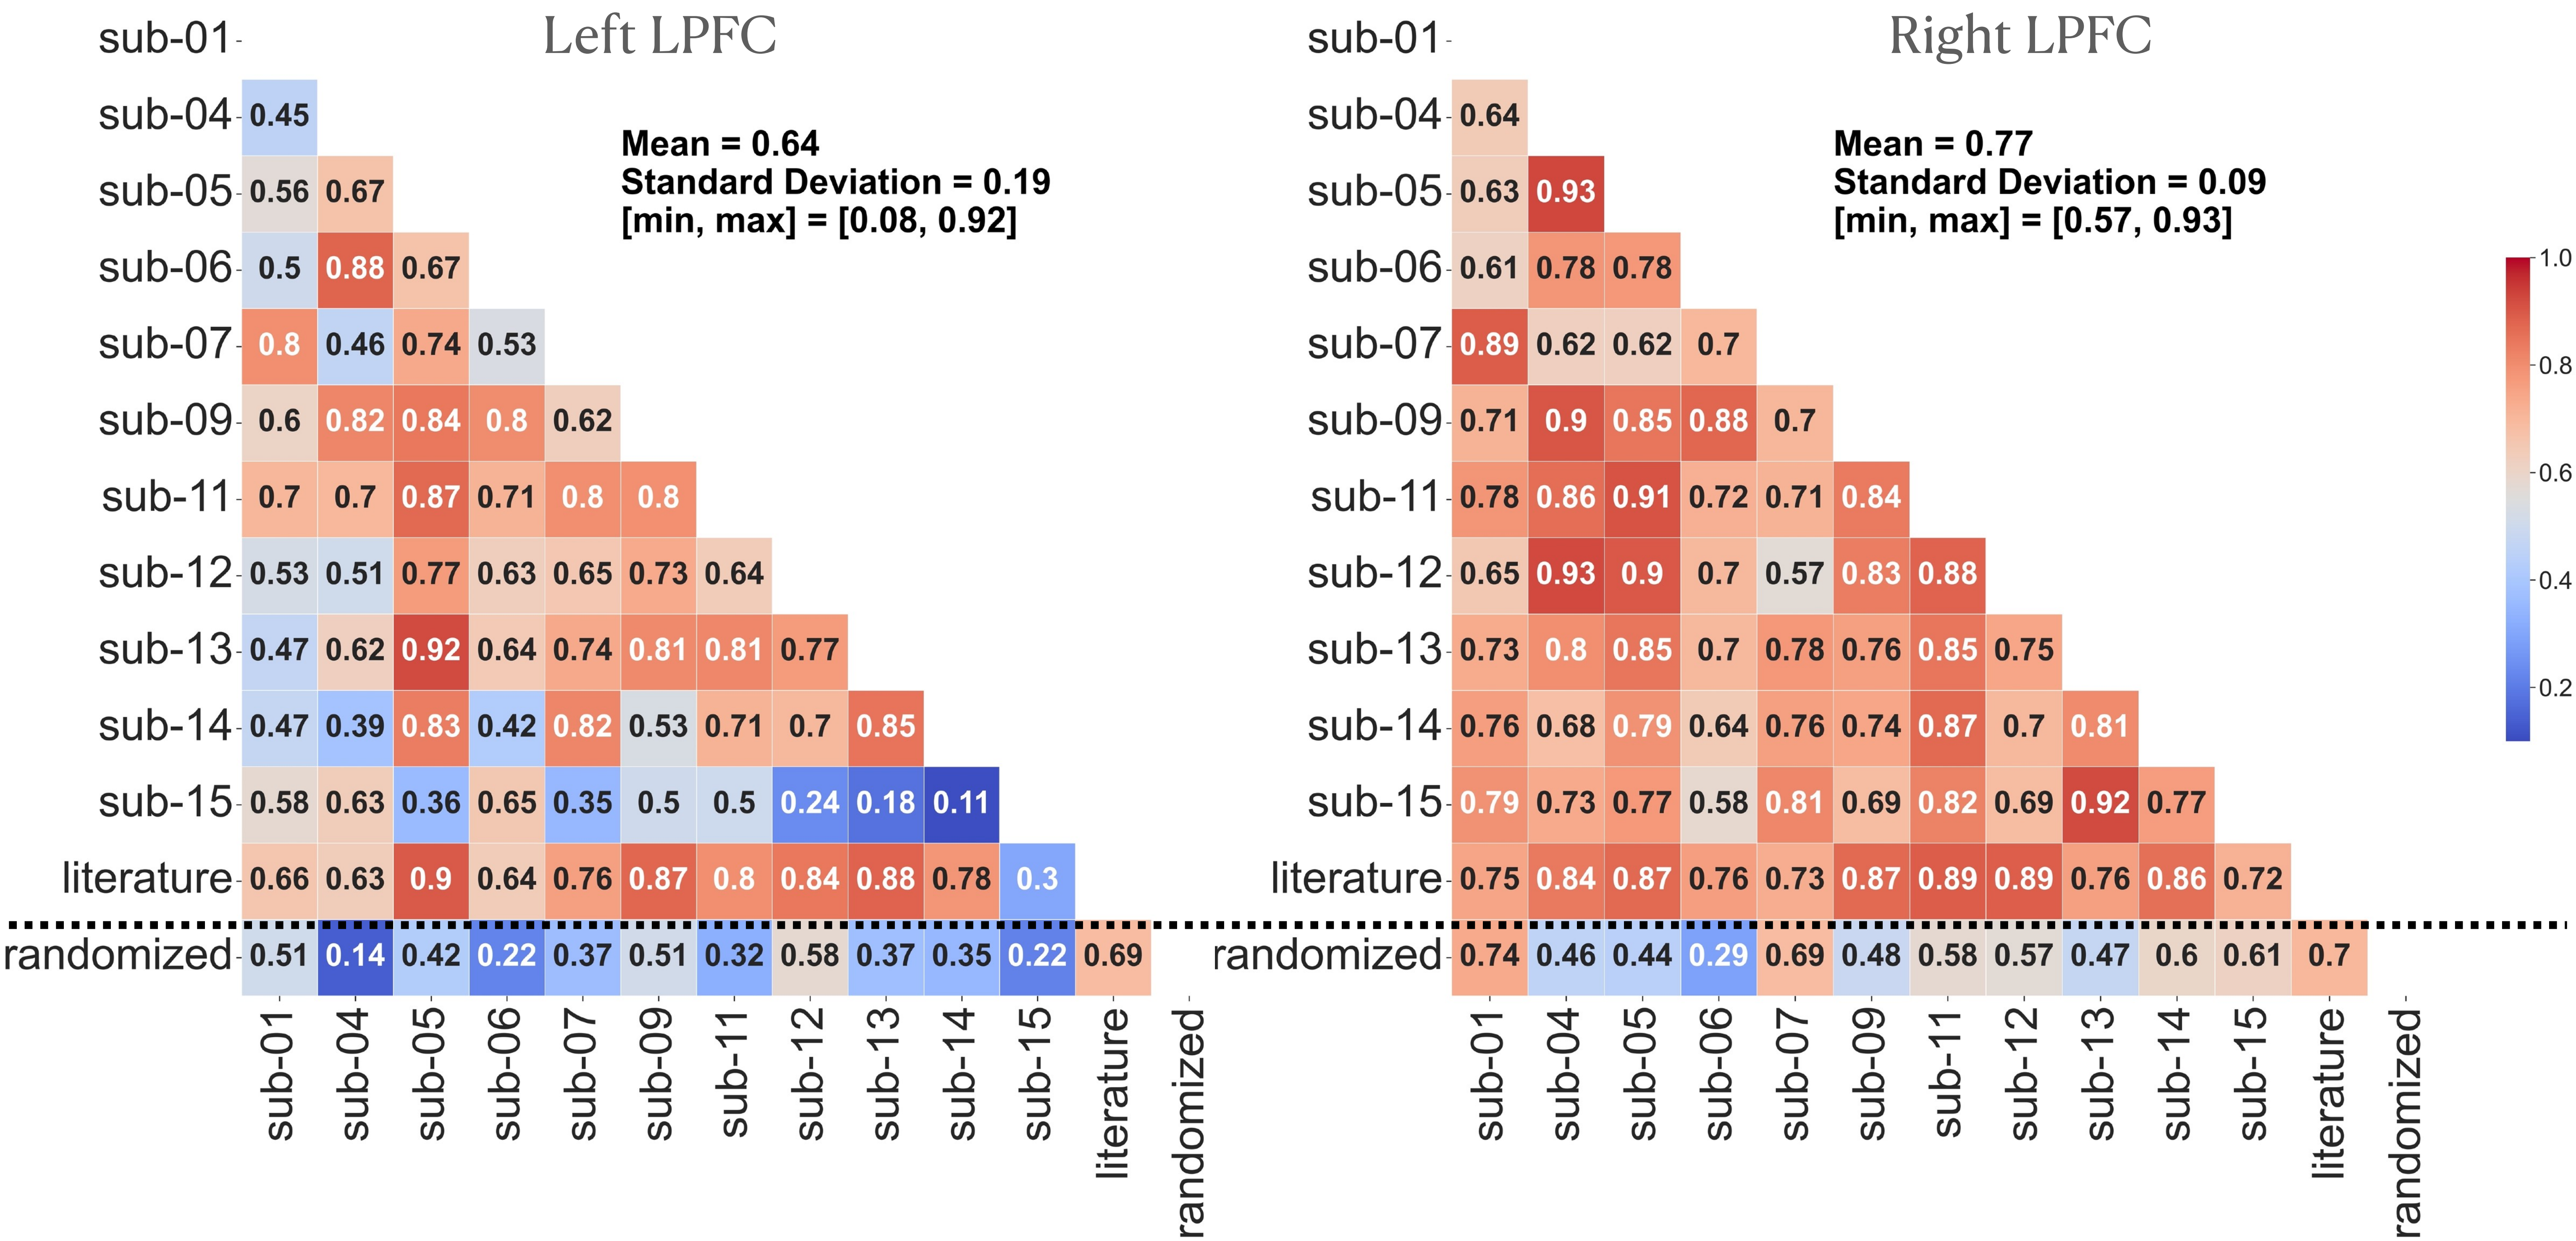

Supplement: supp [file elife-76926-supp-v1.zip]
