# Supplementary material for: Functional gradients in the human lateral prefrontal cortex revealed by a comprehensive coordinate-based meta-analysis
Source: eLife journal article supplement (doi:10.7554/elife.76926), 2022-09-28

# The Principal LPFC Gradient at Long Distances

**A** Principal LPFC Gradient ( $d > 20$  mm)

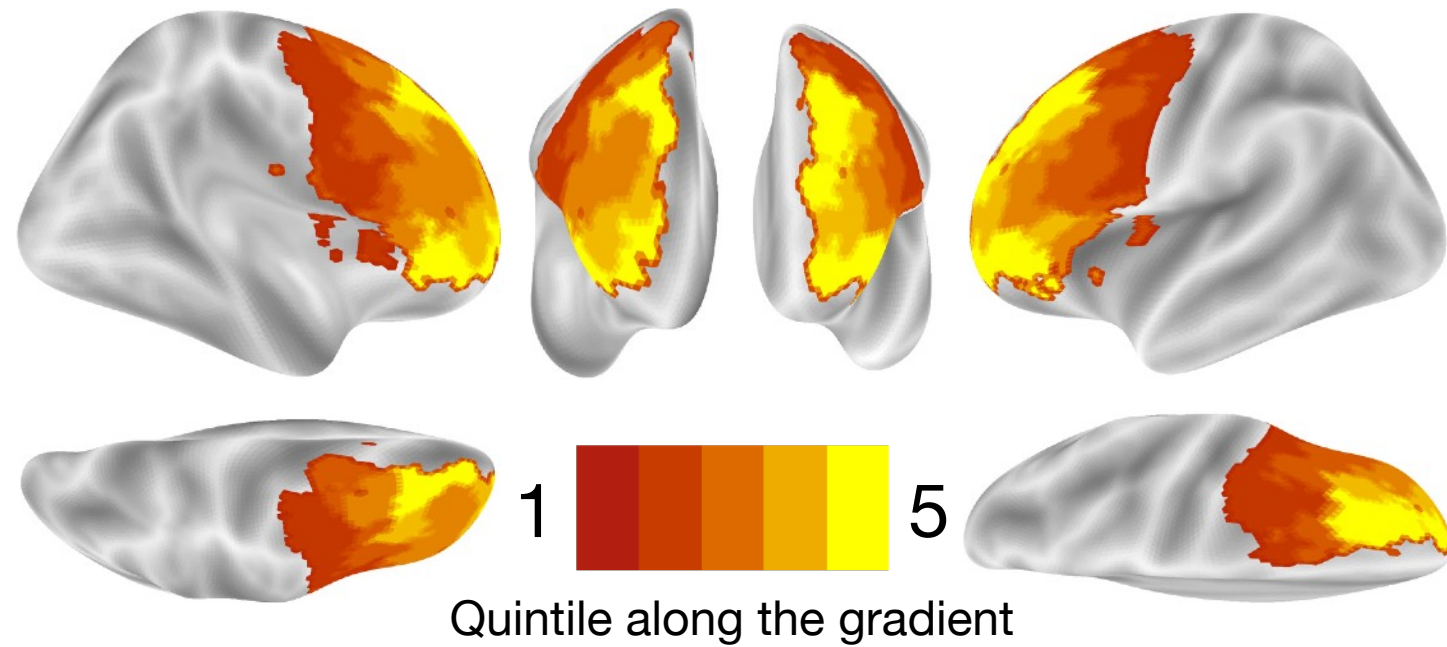

**B** Principal LPFC Gradient ( $d > 40$  mm)

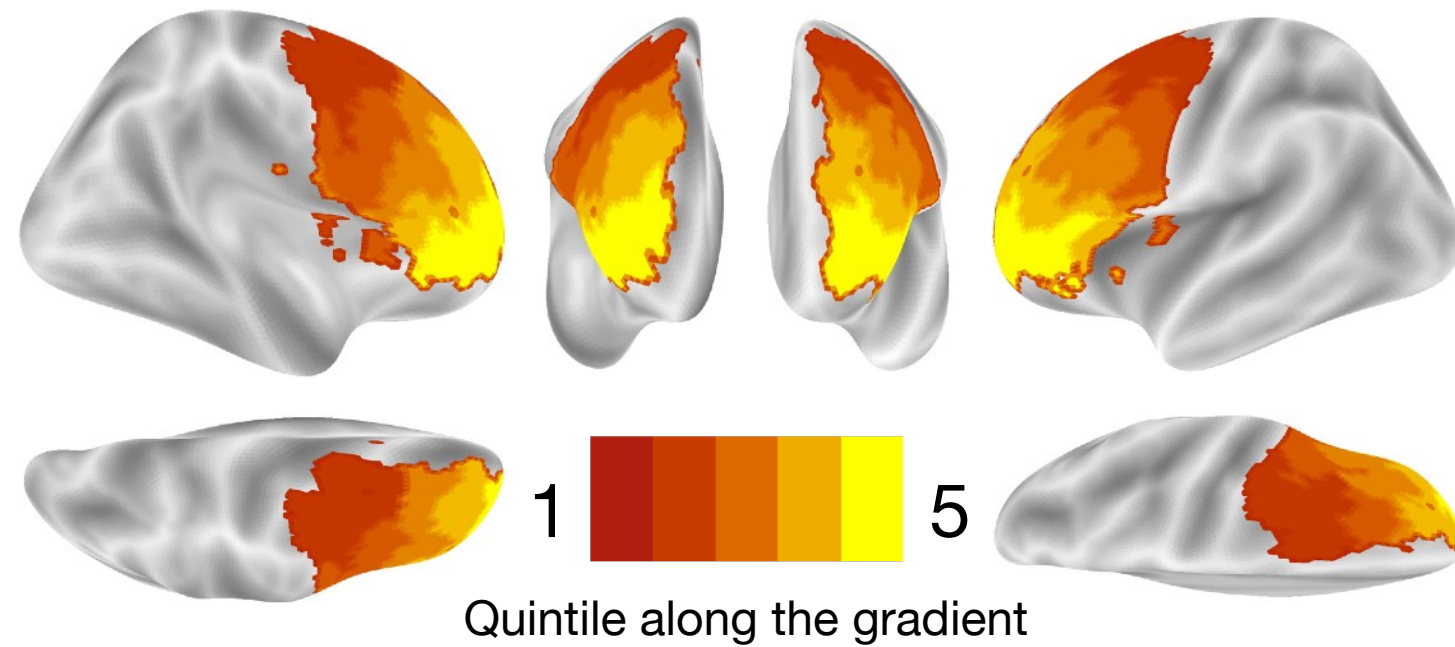

**C** Principal LPFC Gradient ( $d > 60$  mm)

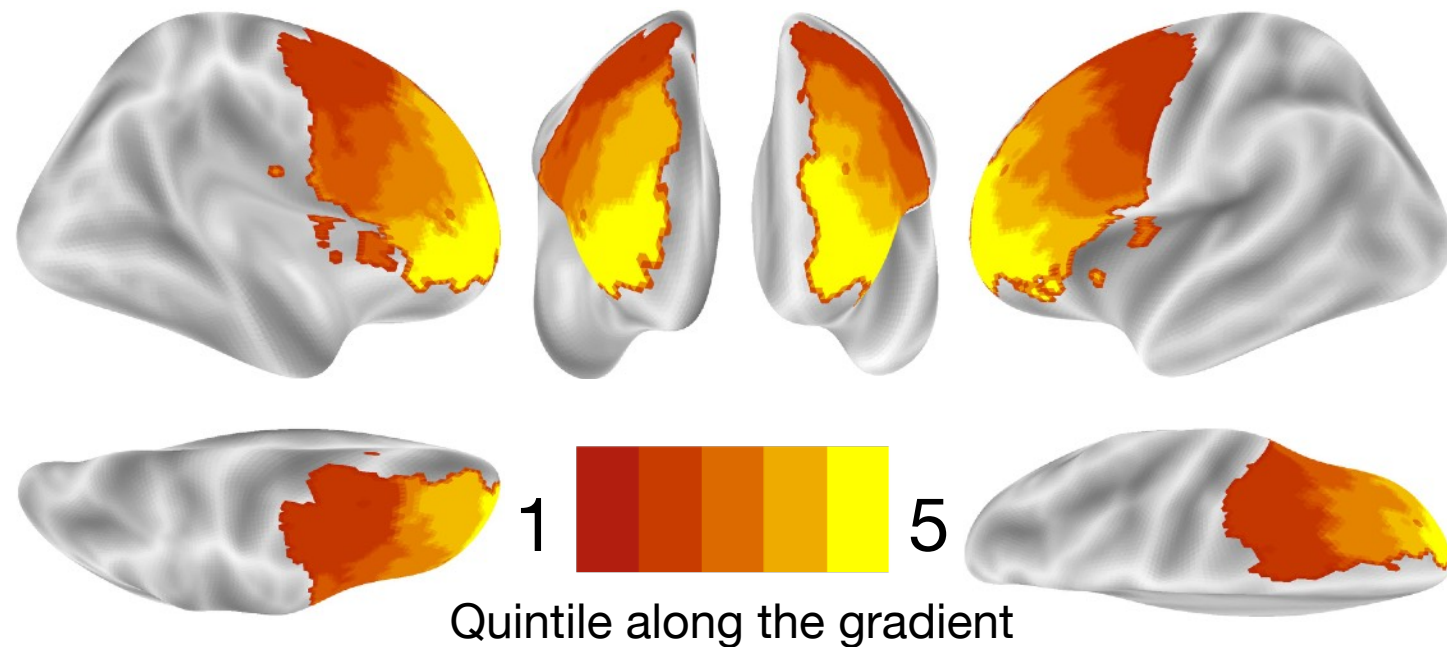

**D** Principal LPFC Gradient  
(No Intra-LPFC Coactivations)

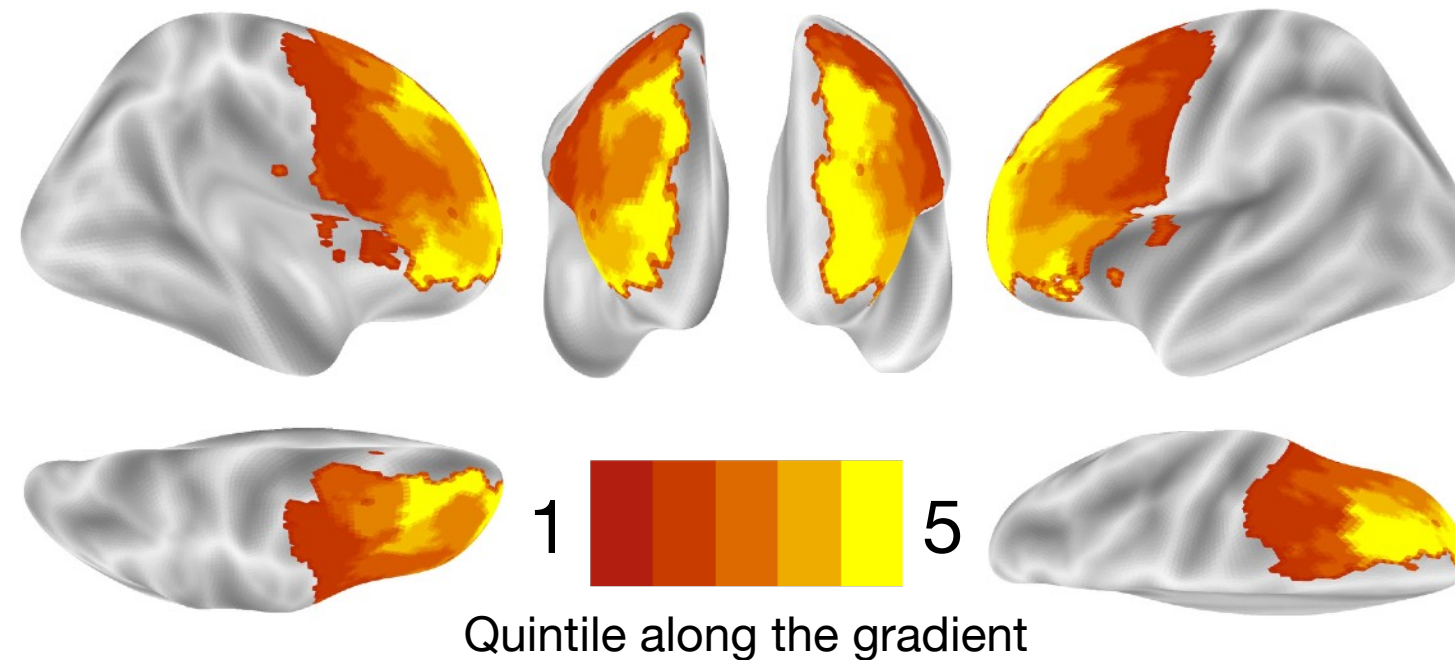

Supplement: supp [file elife-76926-supp-v1.zip]
