# Supplementary material for: Functional gradients in the human lateral prefrontal cortex revealed by a comprehensive coordinate-based meta-analysis
Source: eLife journal article supplement (doi:10.7554/elife.76926), 2022-09-28

# A Correlation Between the Principal Meta-Analytic Connectivity Gradient and the Principal Resting-State Connectivity Gradient in the LPFC

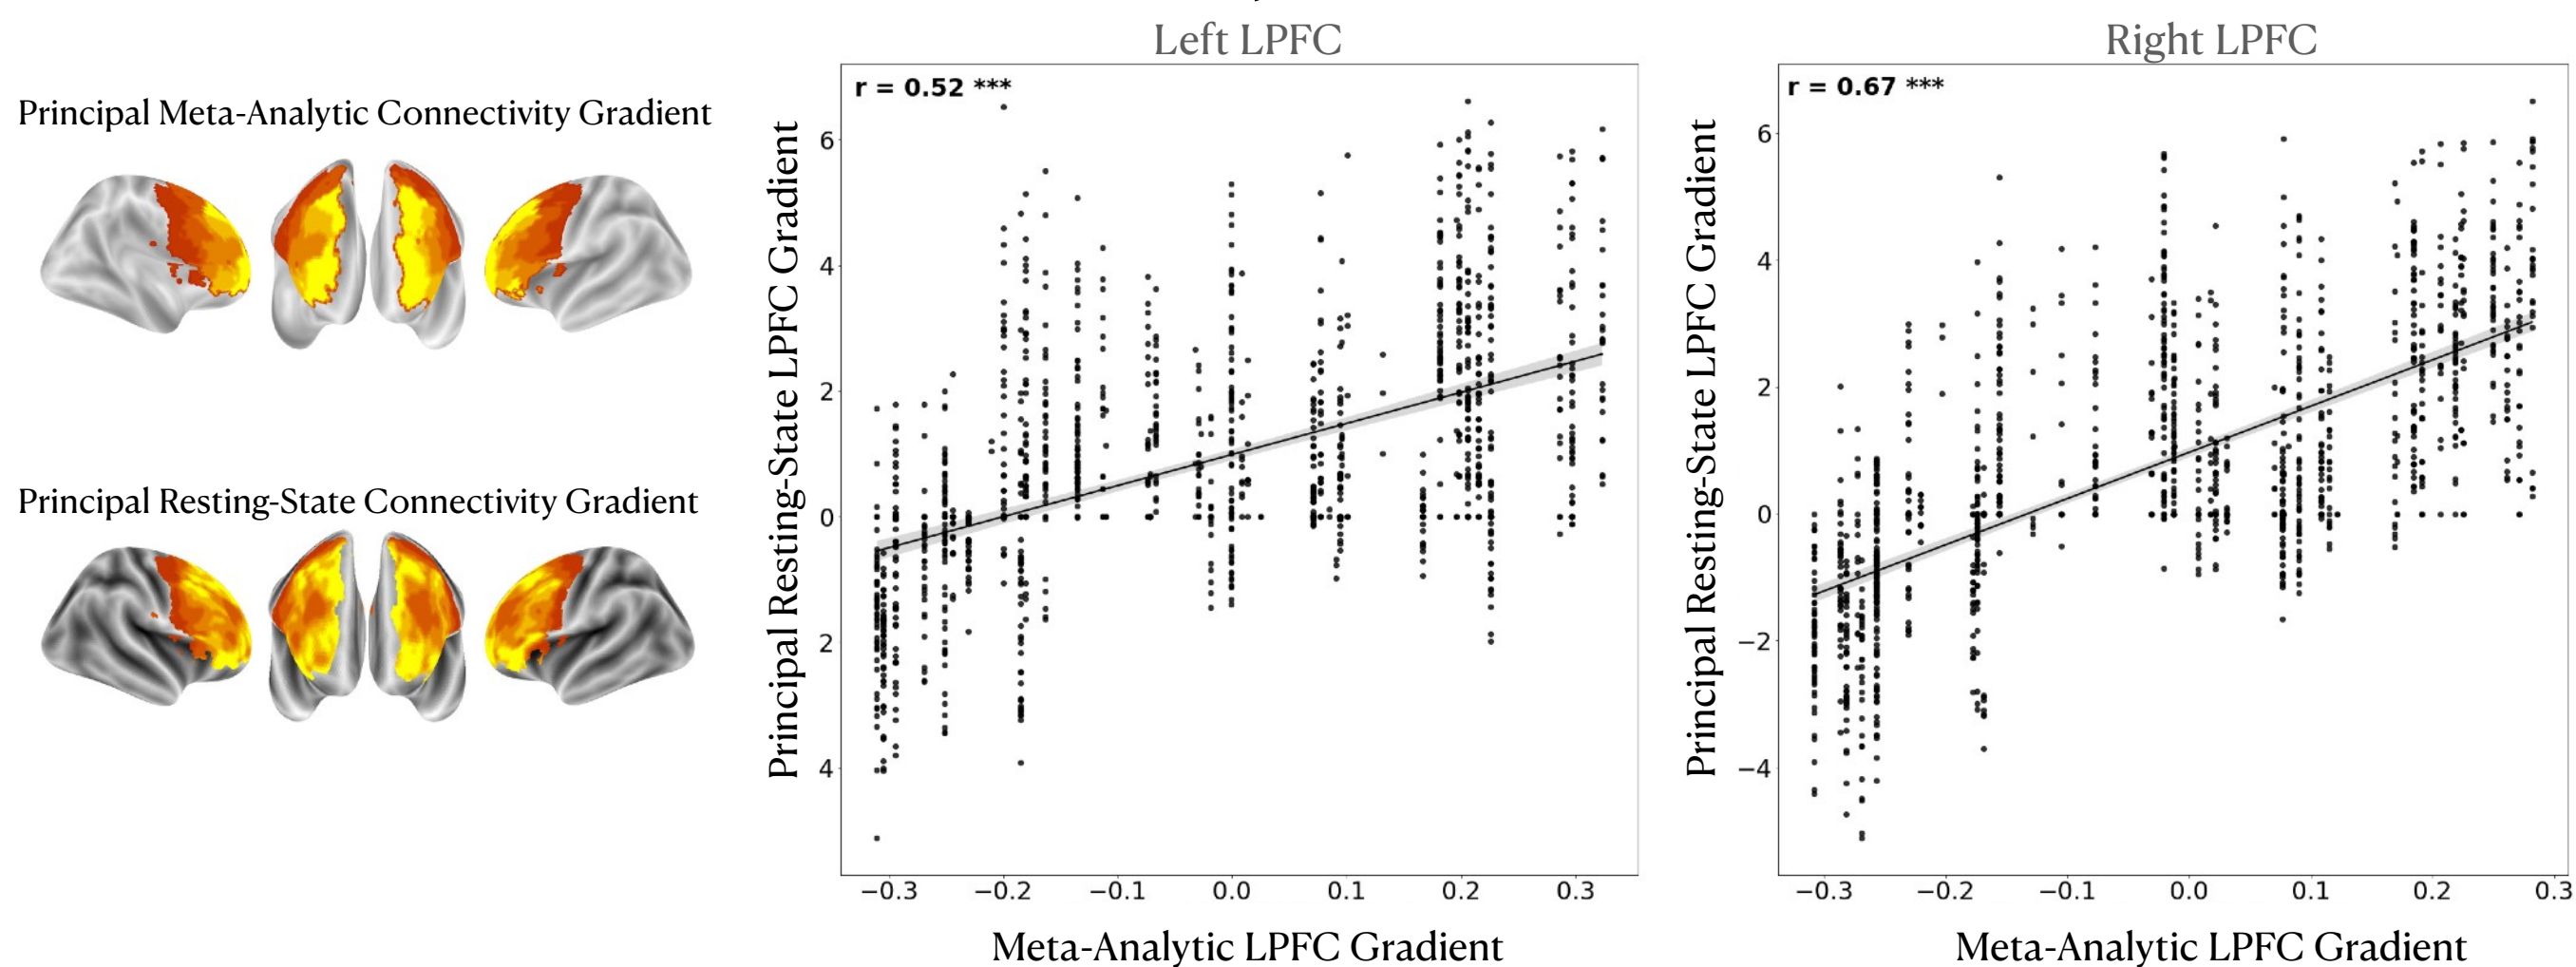

## **B** Correlation Between the Principal Meta-Analytic Connectivity Gradient and the Third Resting-State Connectivity Gradient in the LPFC

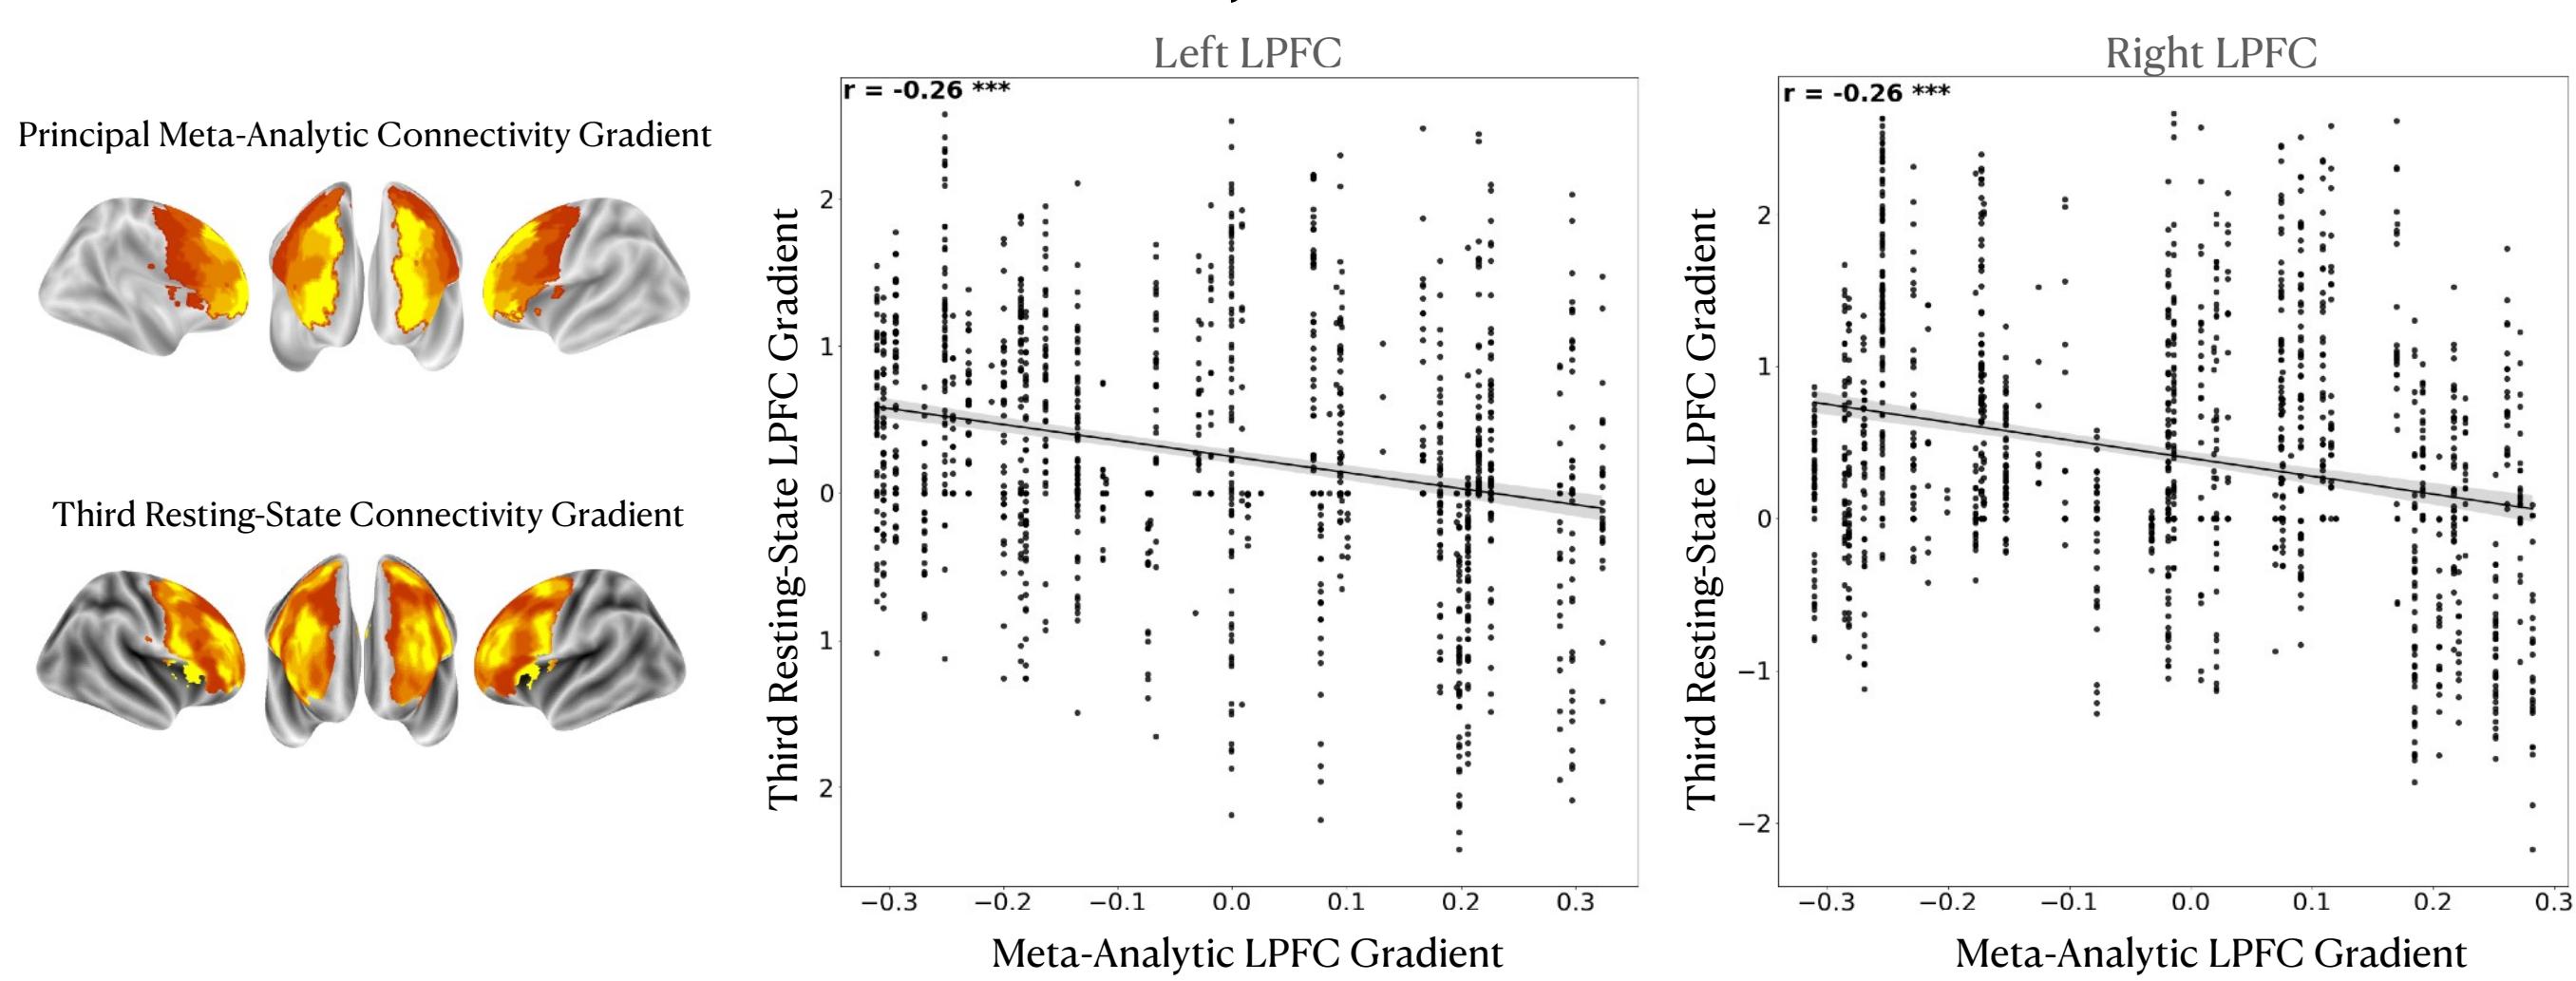

Supplement: supp [file elife-76926-supp-v1.zip]
