# Supplementary material for: Functional gradients in the human lateral prefrontal cortex revealed by a comprehensive coordinate-based meta-analysis
Source: eLife journal article supplement (doi:10.7554/elife.76926), 2022-09-28

# Percentage of Variance Explained by Diffusion Embedding Components in LPFC across 5000 sub-samples of the Neurosynth Dataset

Left LPFC

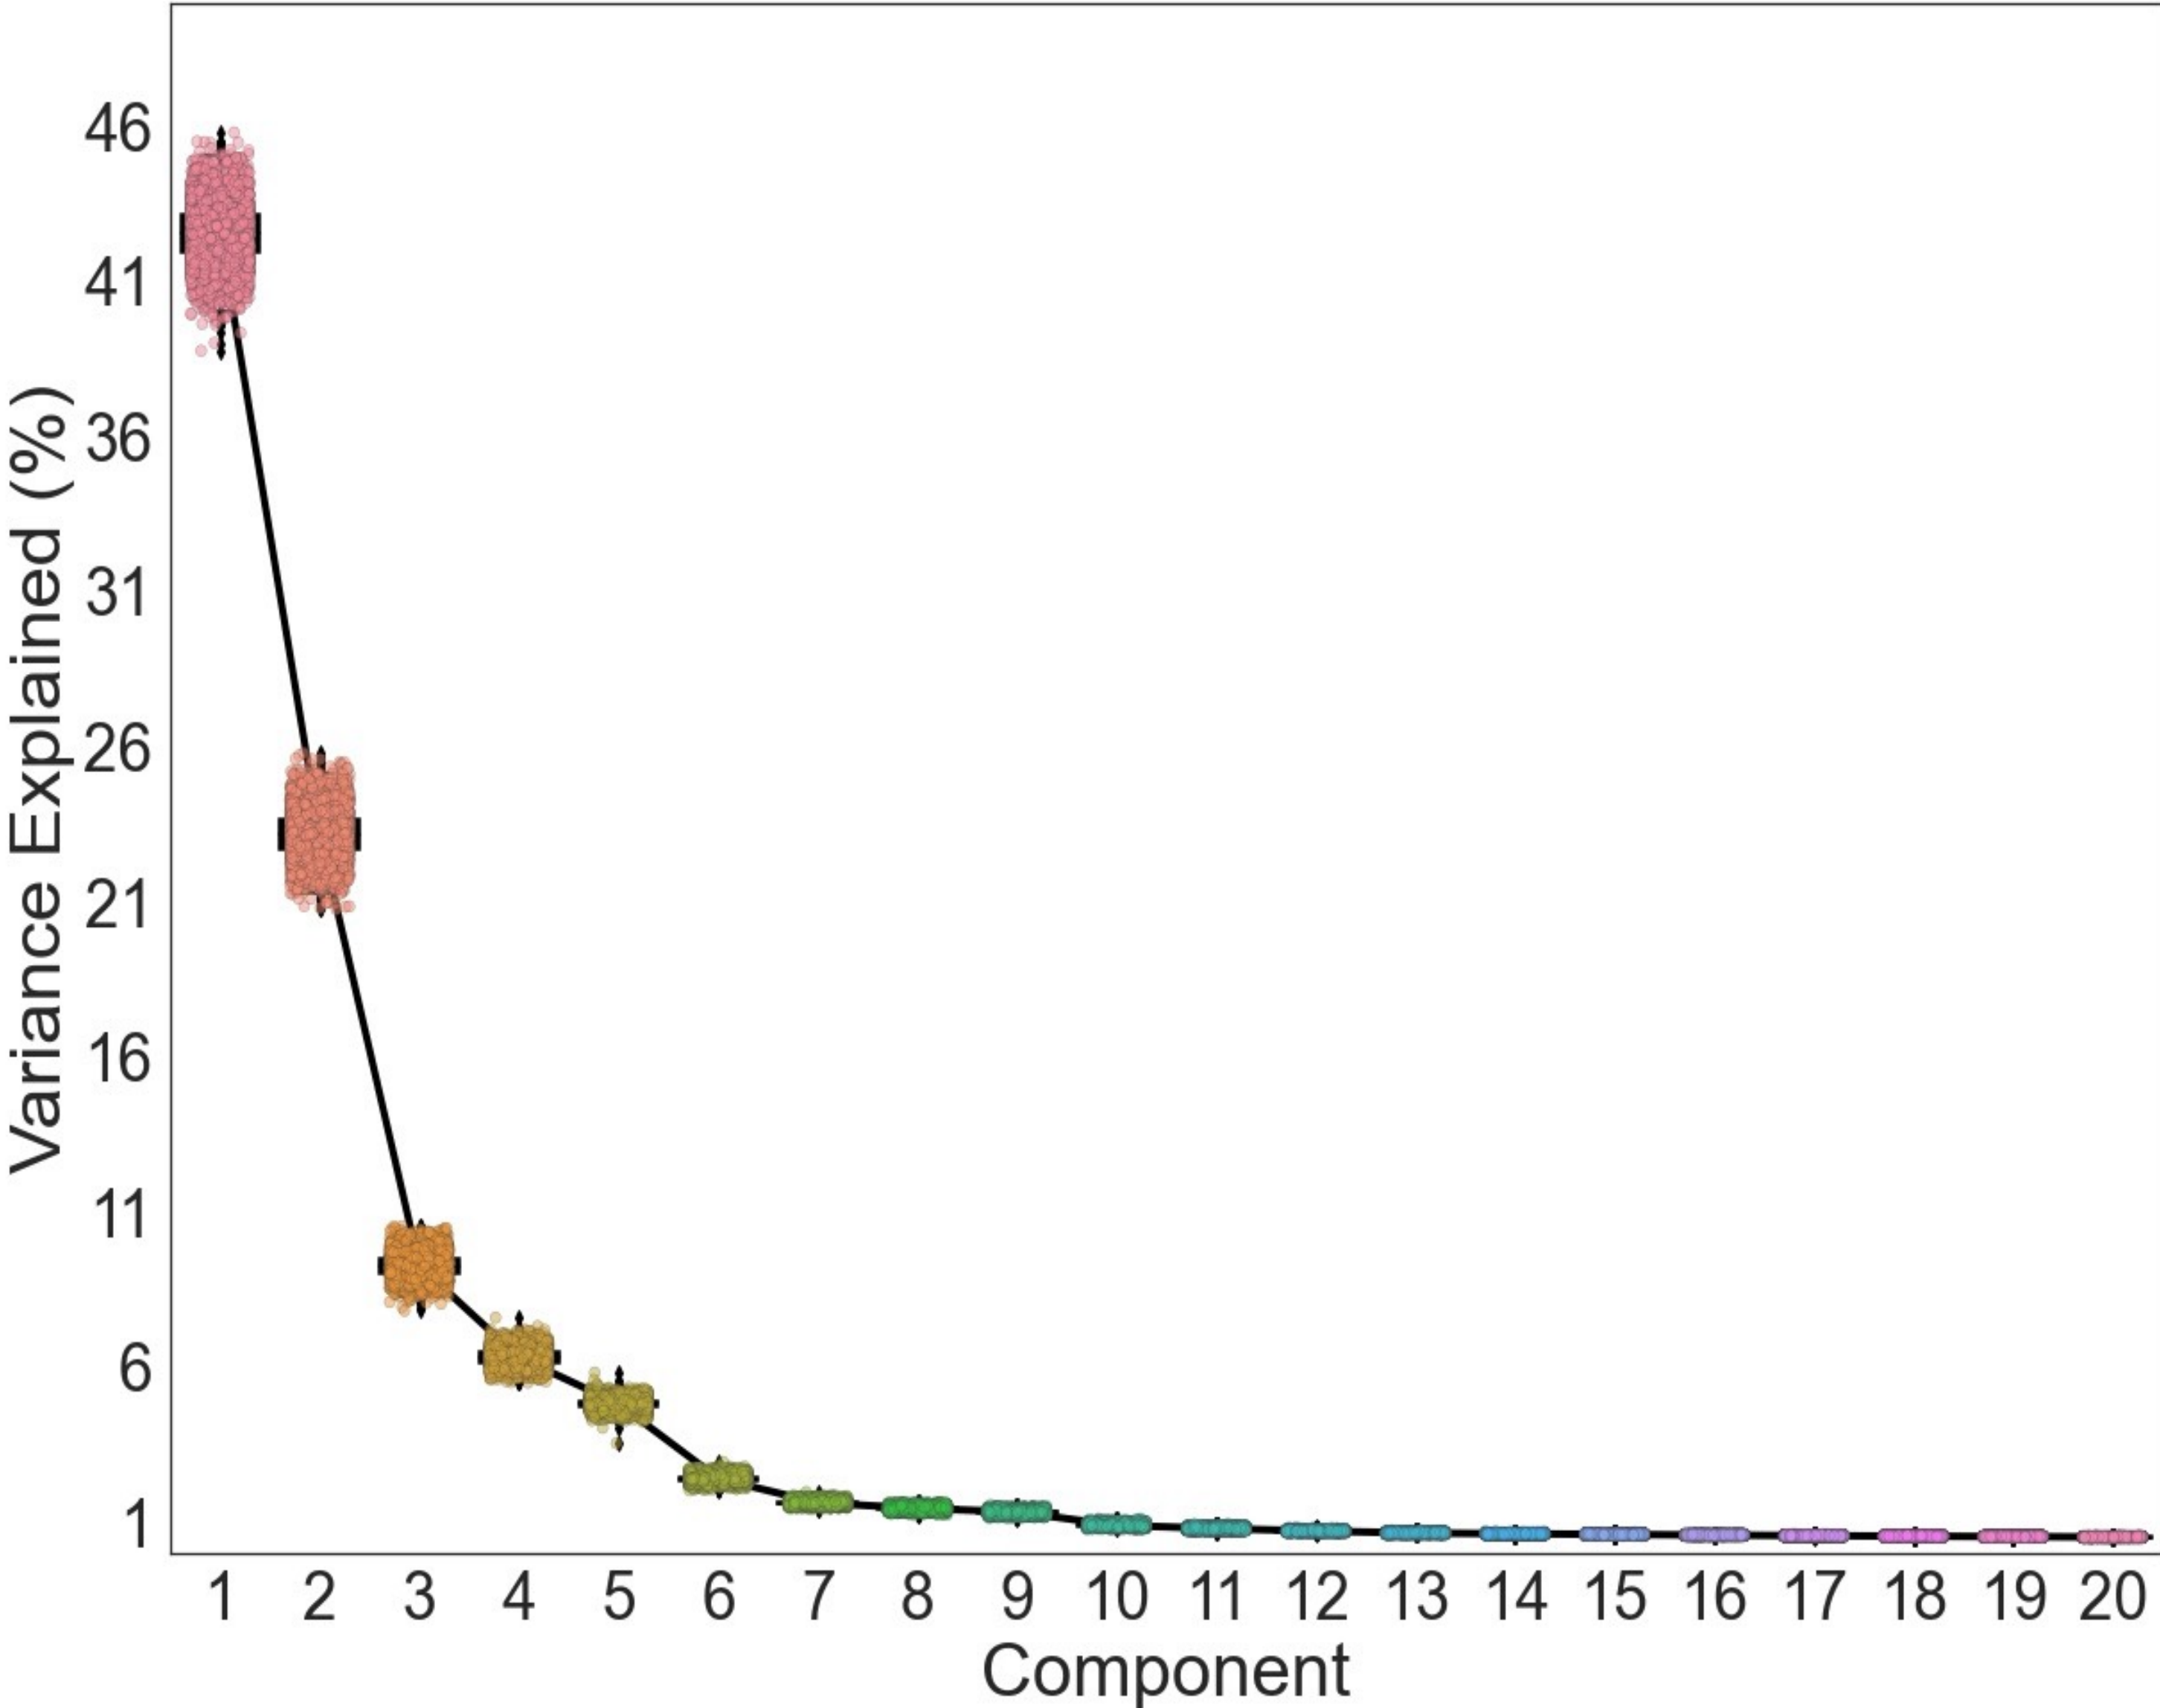

Right LPFC

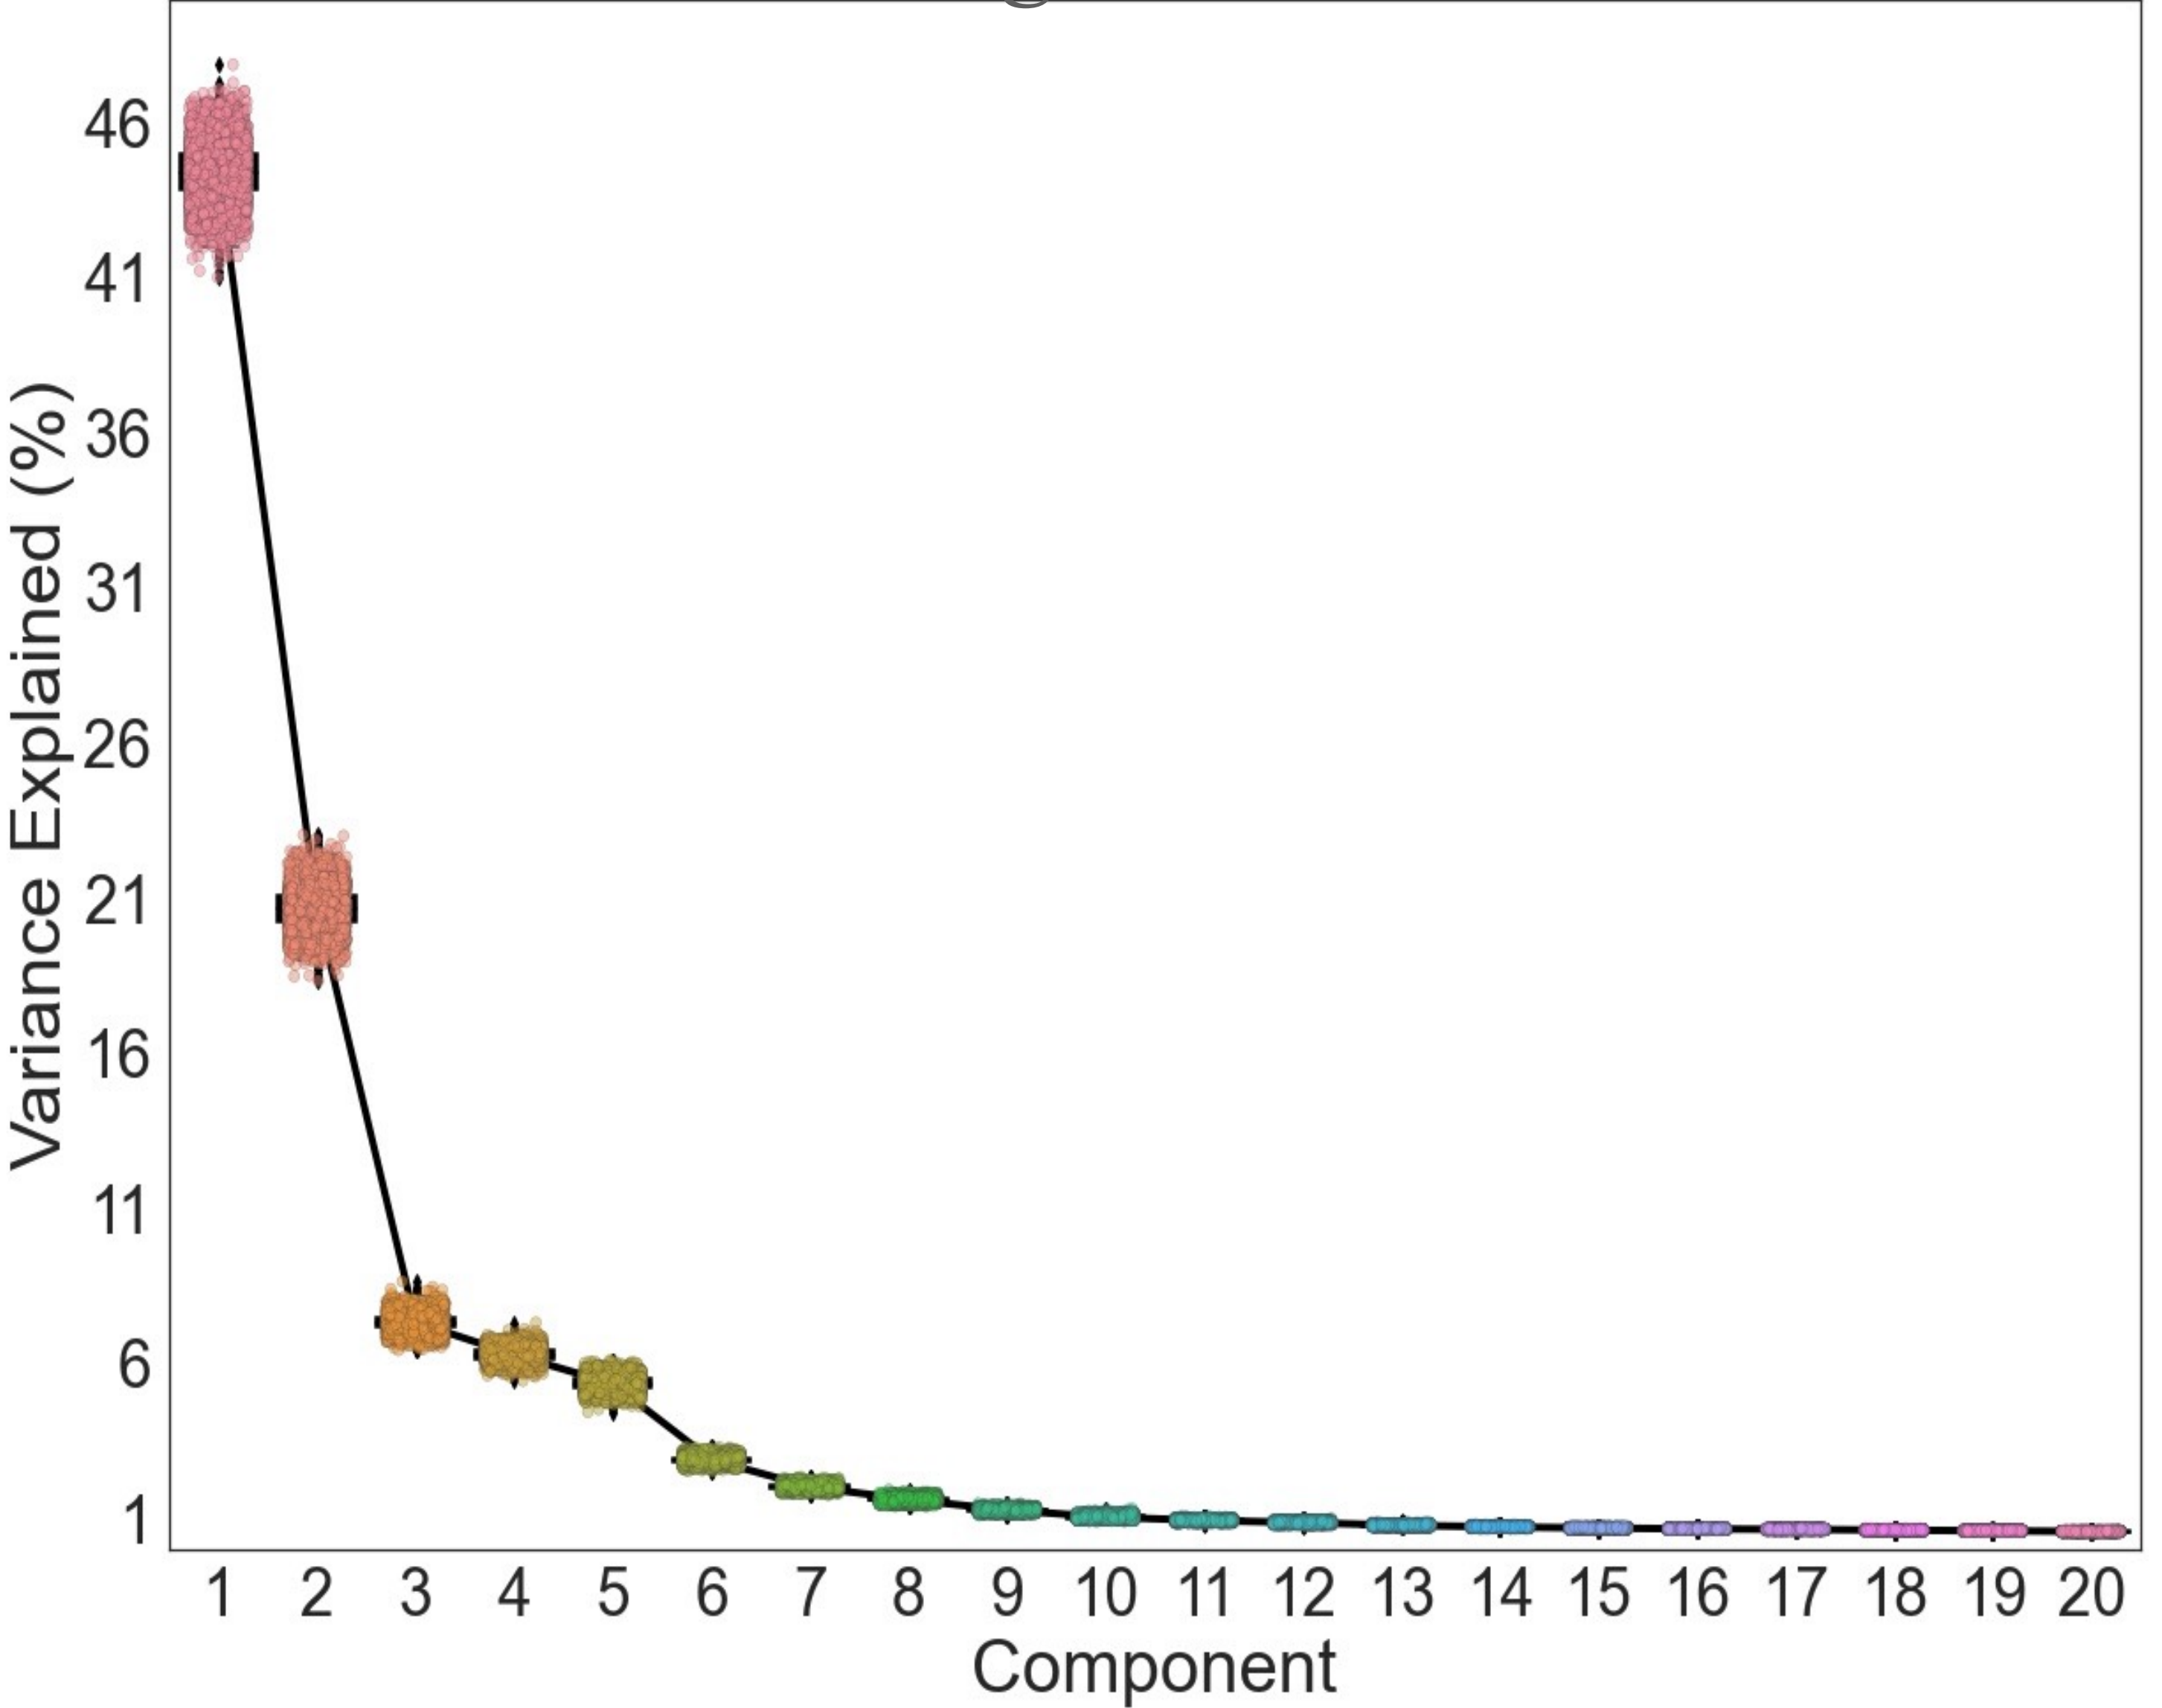

Supplement: supp [file elife-76926-supp-v1.zip]
