# Supplementary material for: Functional gradients in the human lateral prefrontal cortex revealed by a comprehensive coordinate-based meta-analysis
Source: eLife journal article supplement (doi:10.7554/elife.76926), 2022-09-28

# A Quintile Bin Assignment of Left LPFC regions in 5000 Sub-Samples of the Dataset

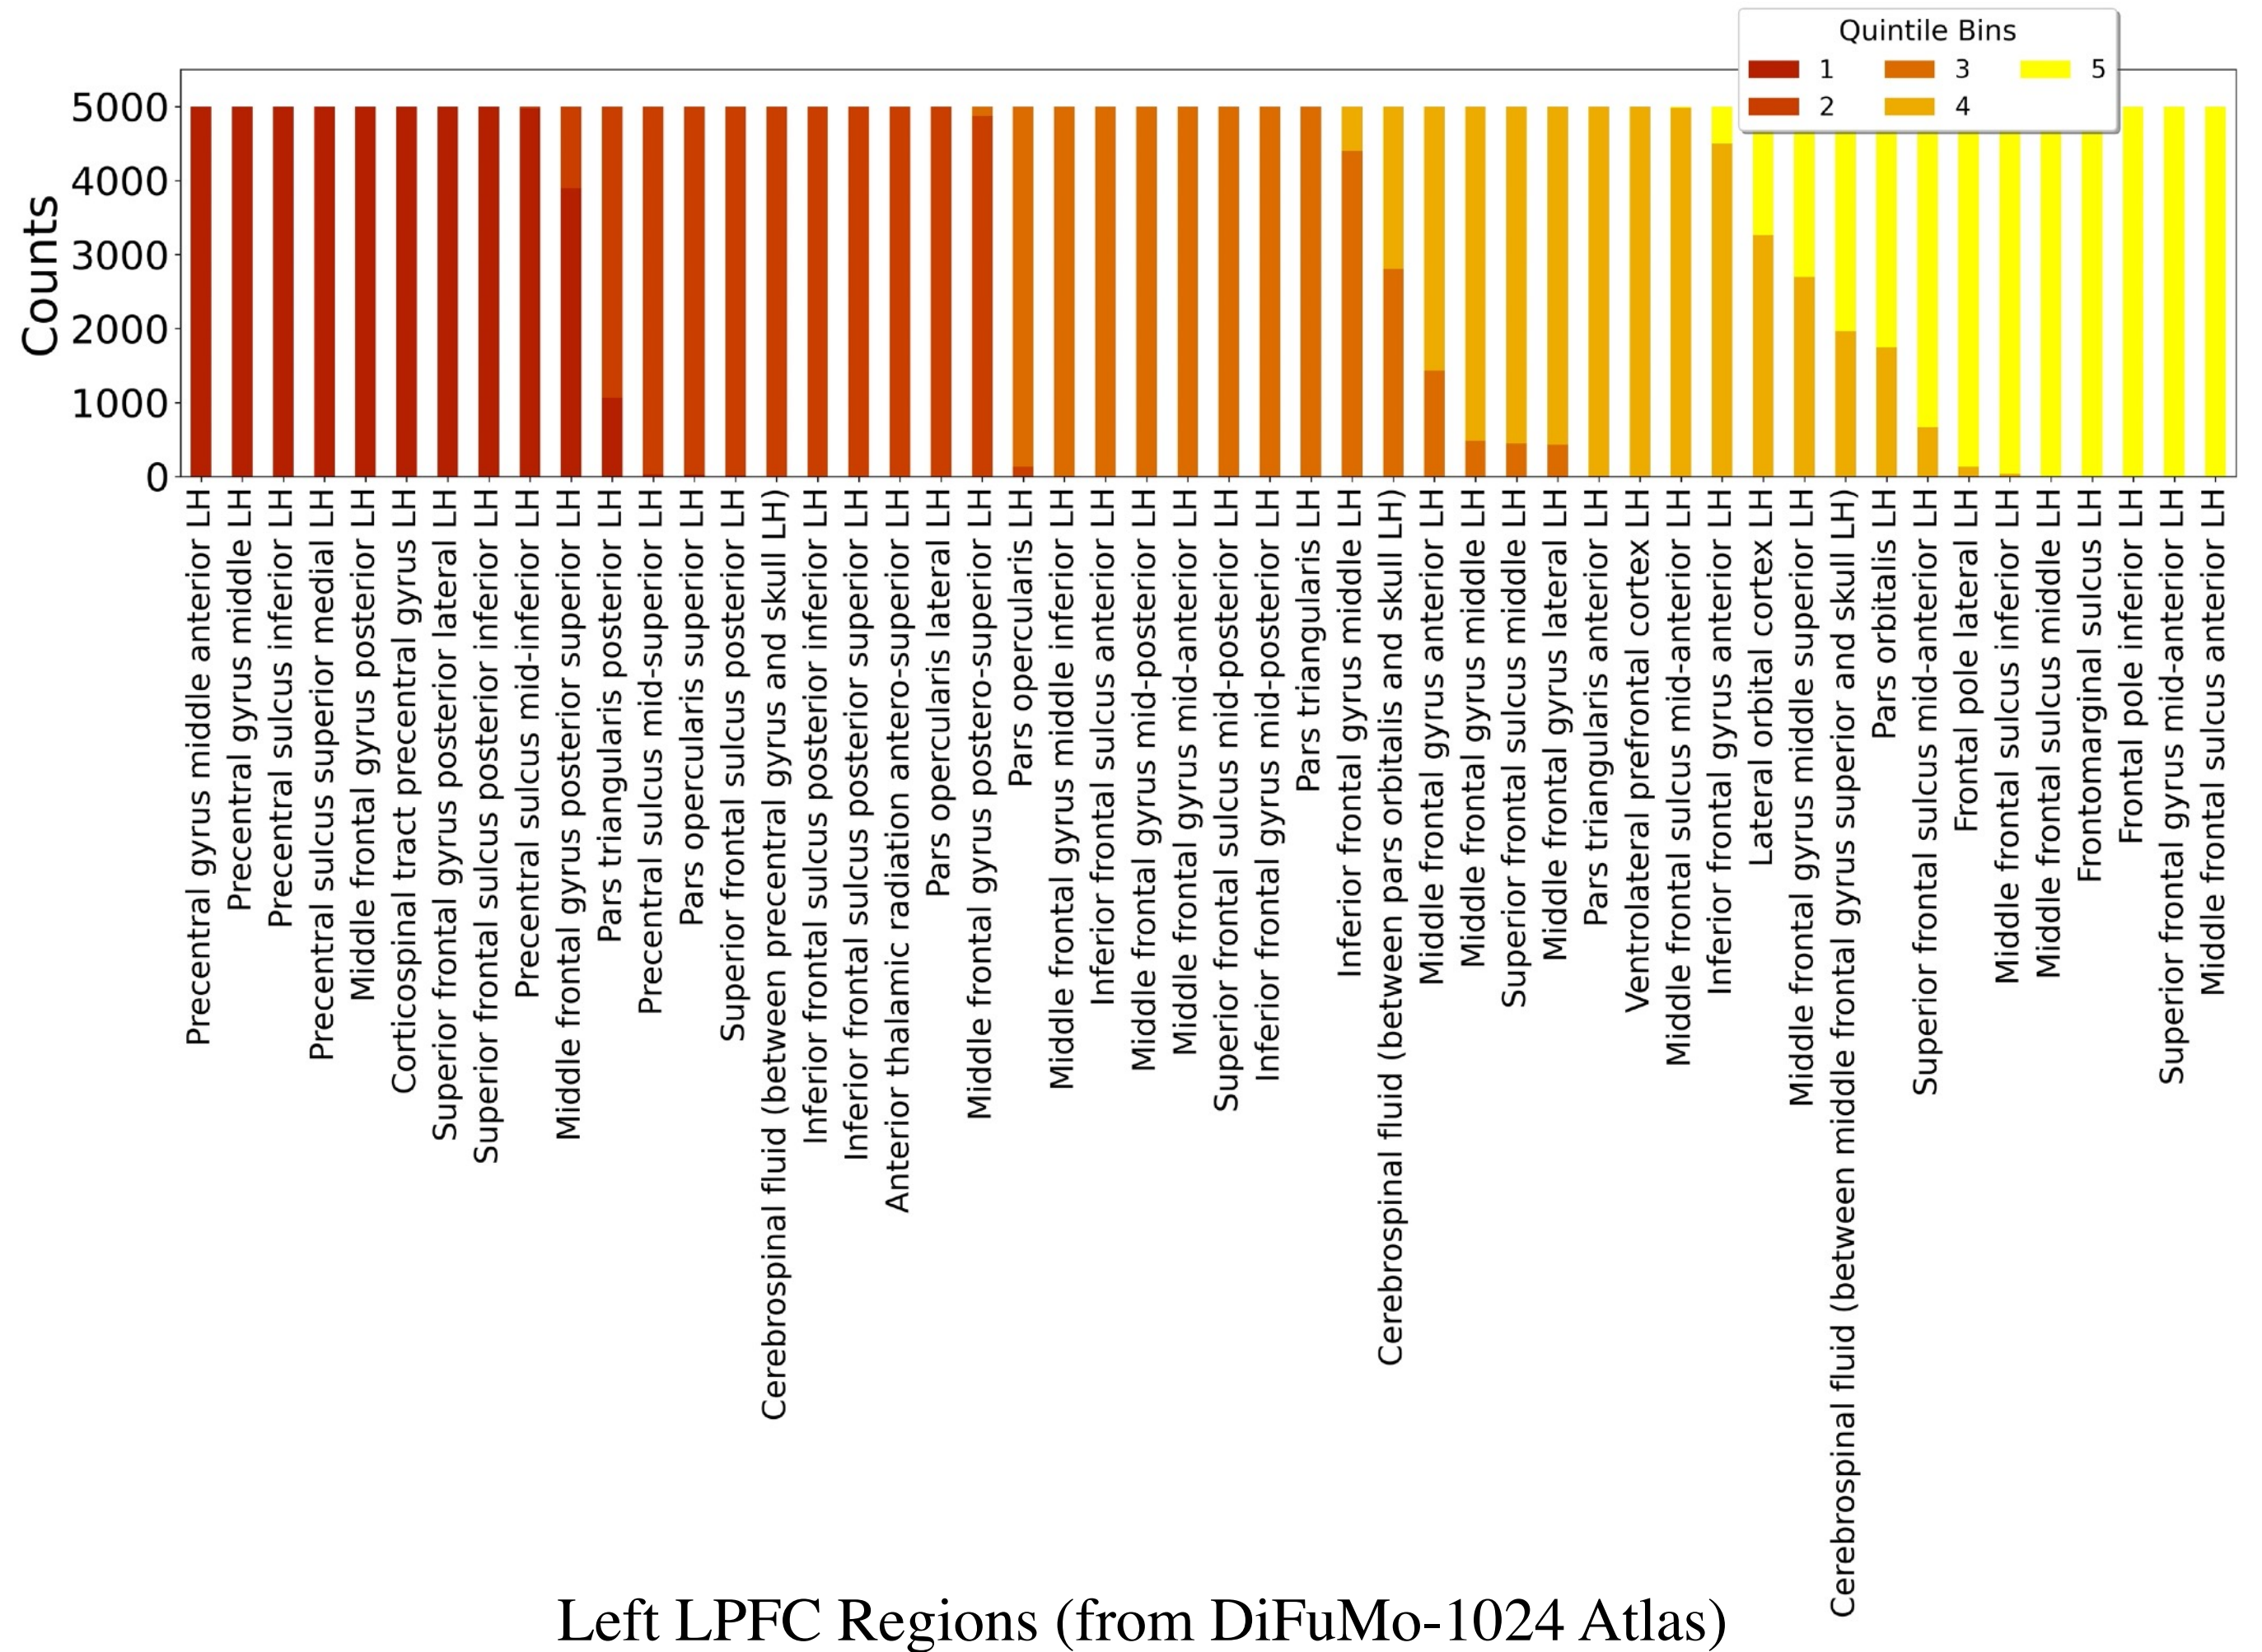

# B Quintile Bin Assignment of Right LPFC regions in 5000 Sub-Samples of the Dataset

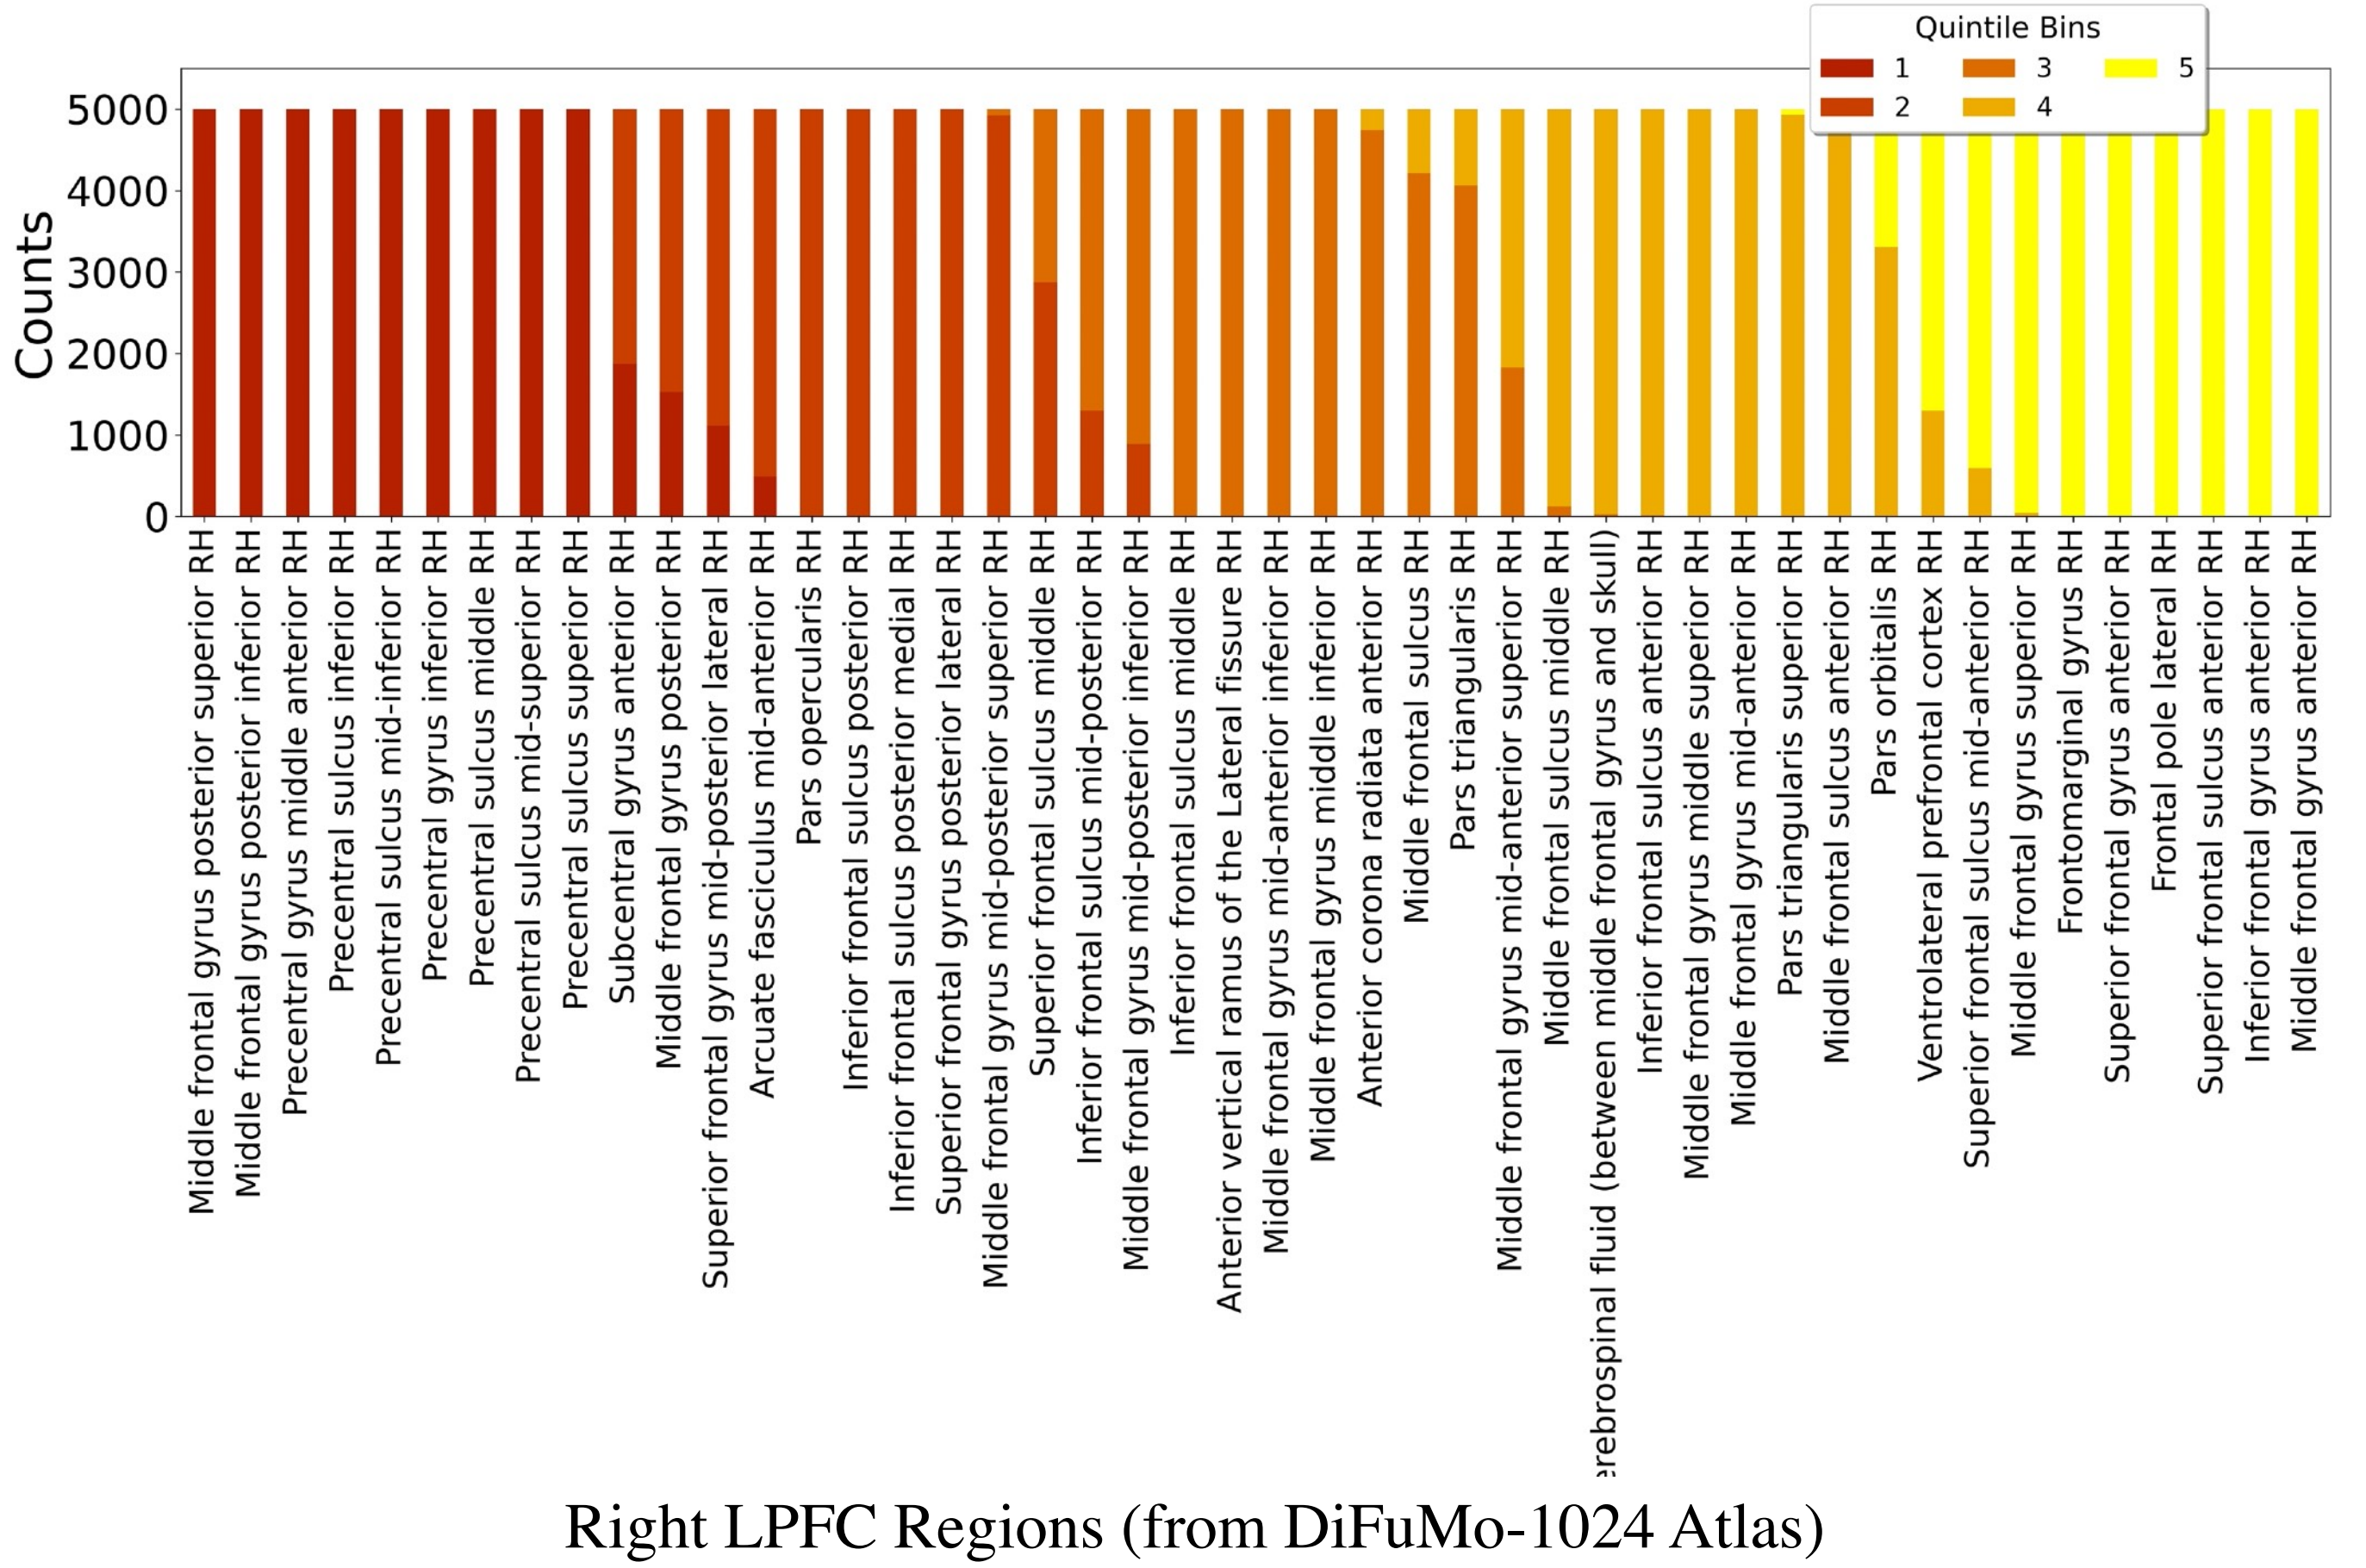

Supplement: supp [file elife-76926-supp-v1.zip]
