# Supplementary figures and images for: Functional gradients in the human lateral prefrontal cortex revealed by a comprehensive coordinate-based meta-analysis
Source: eLife journal article supplement (doi:10.7554/elife.76926), 2022-09-28

## Functional Associations Along the Principal LPFC Gradient (Without Bin Segregation)

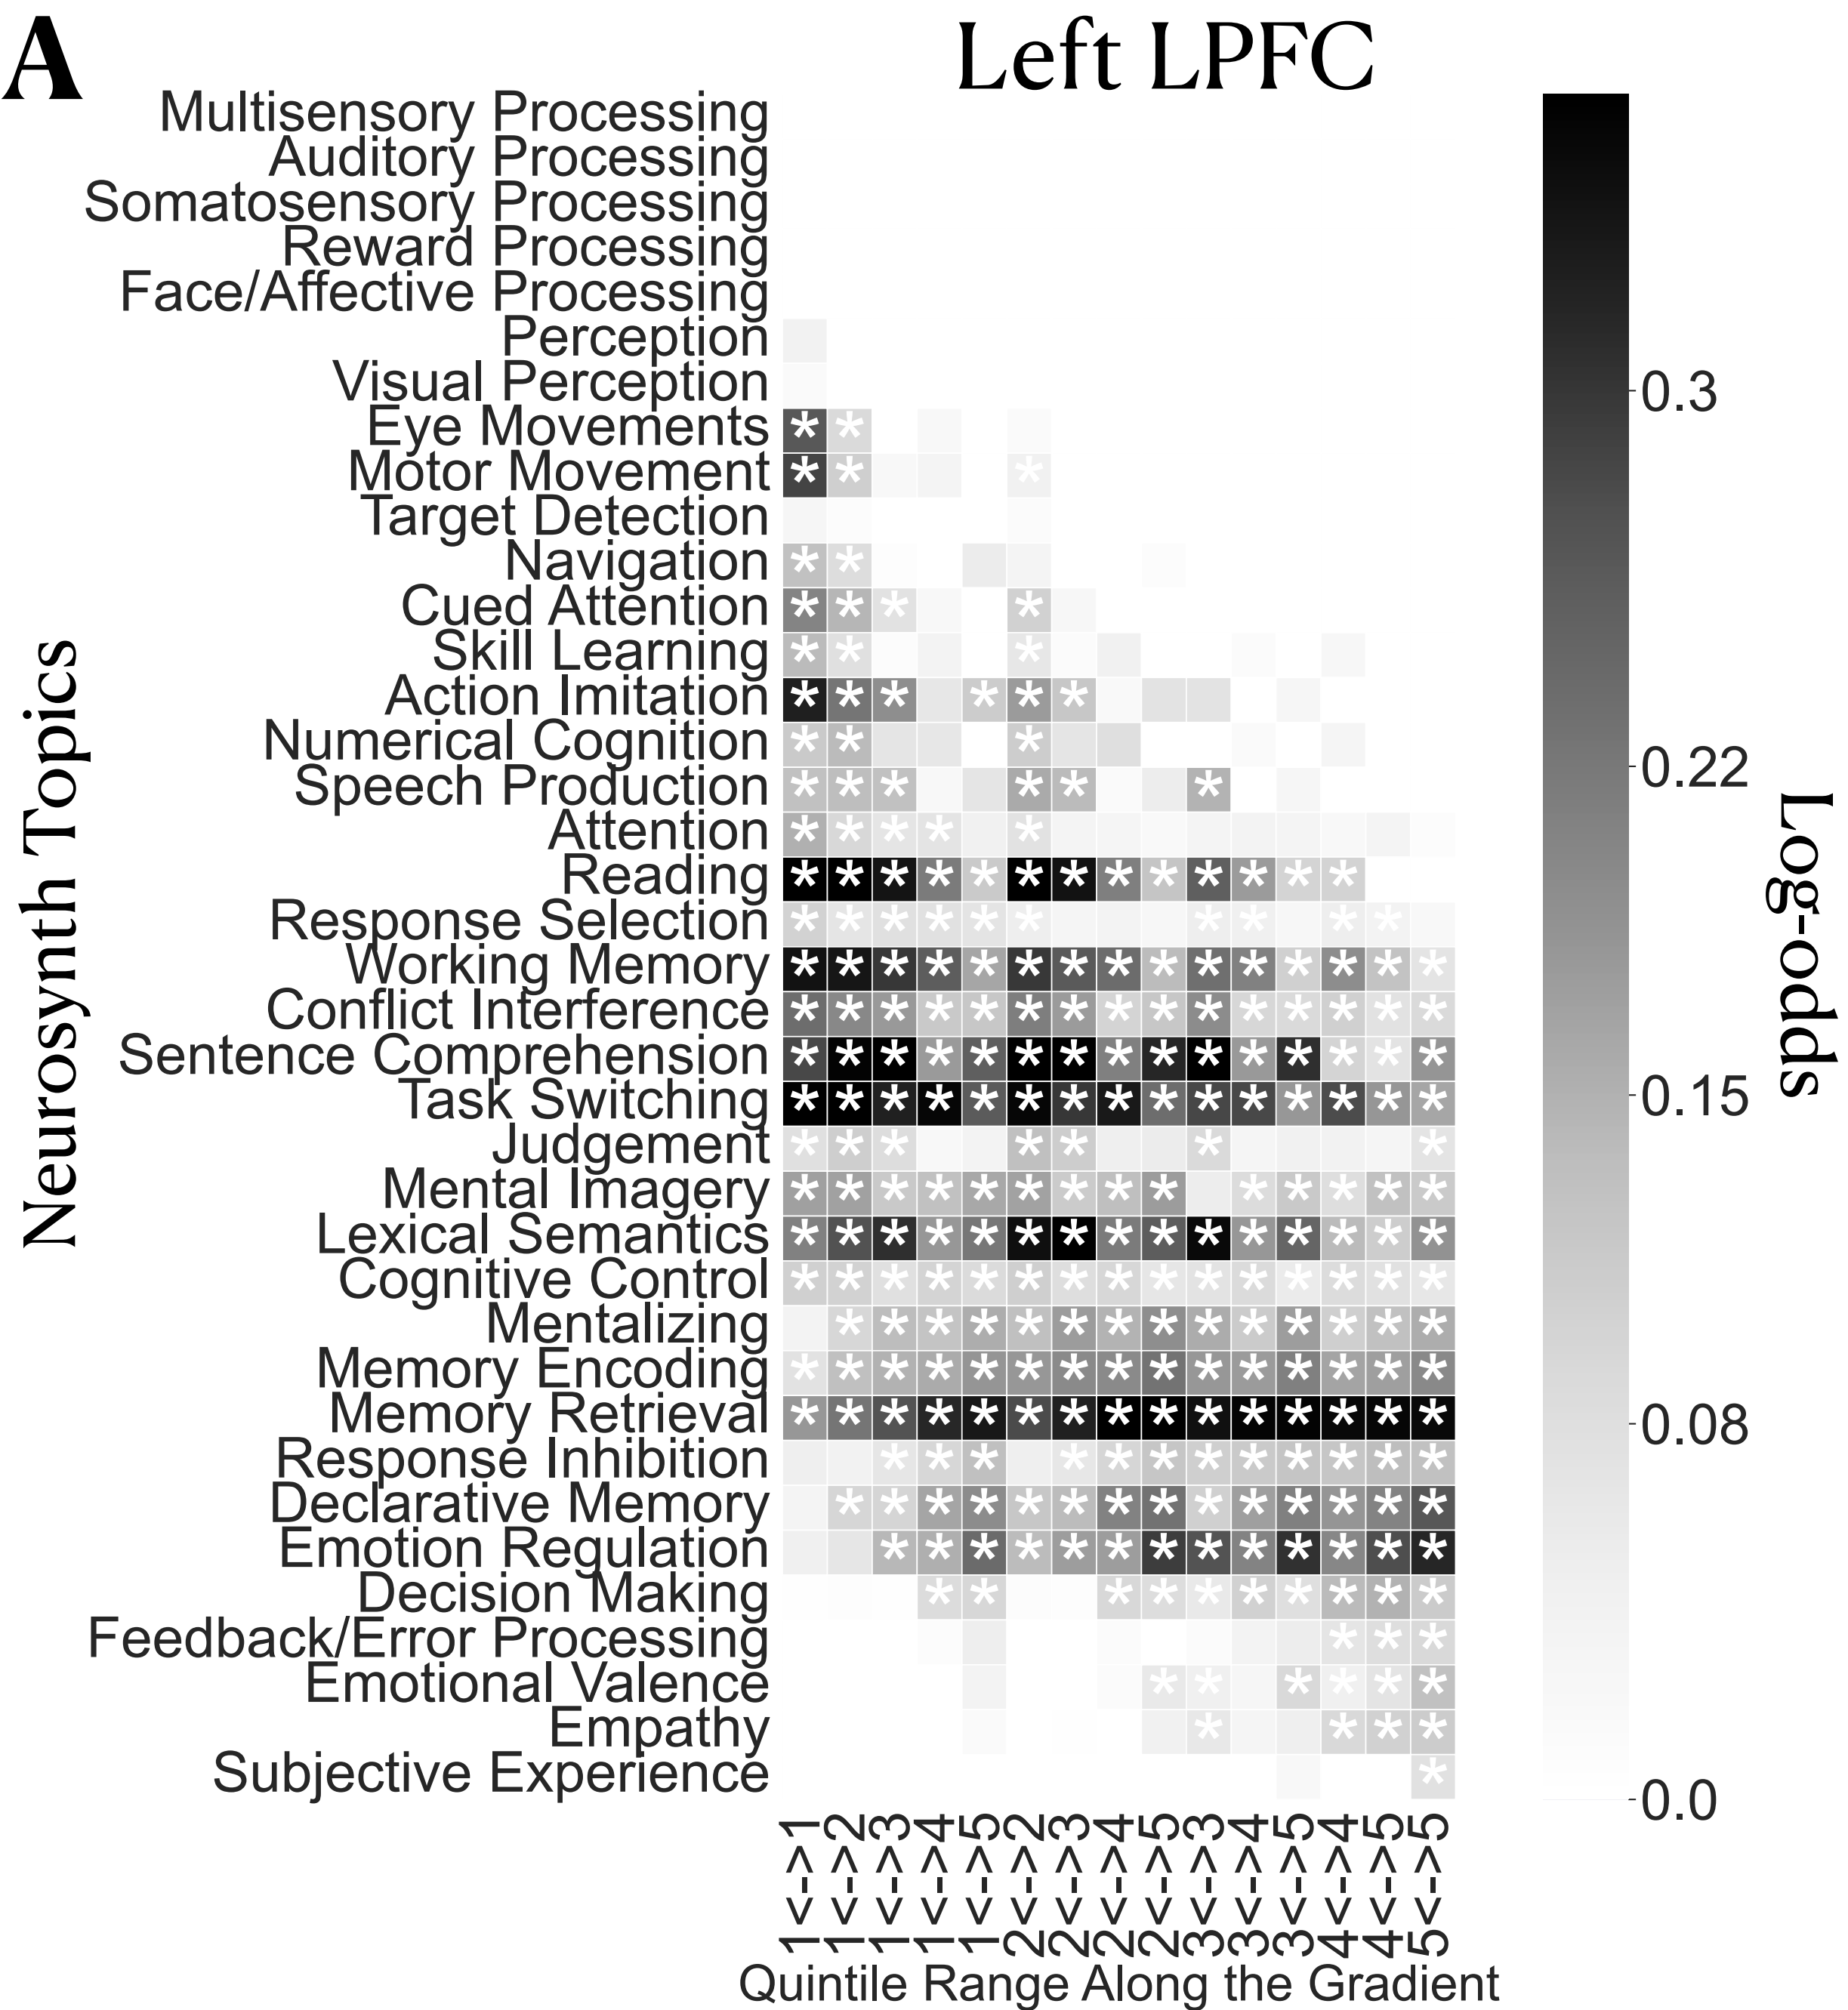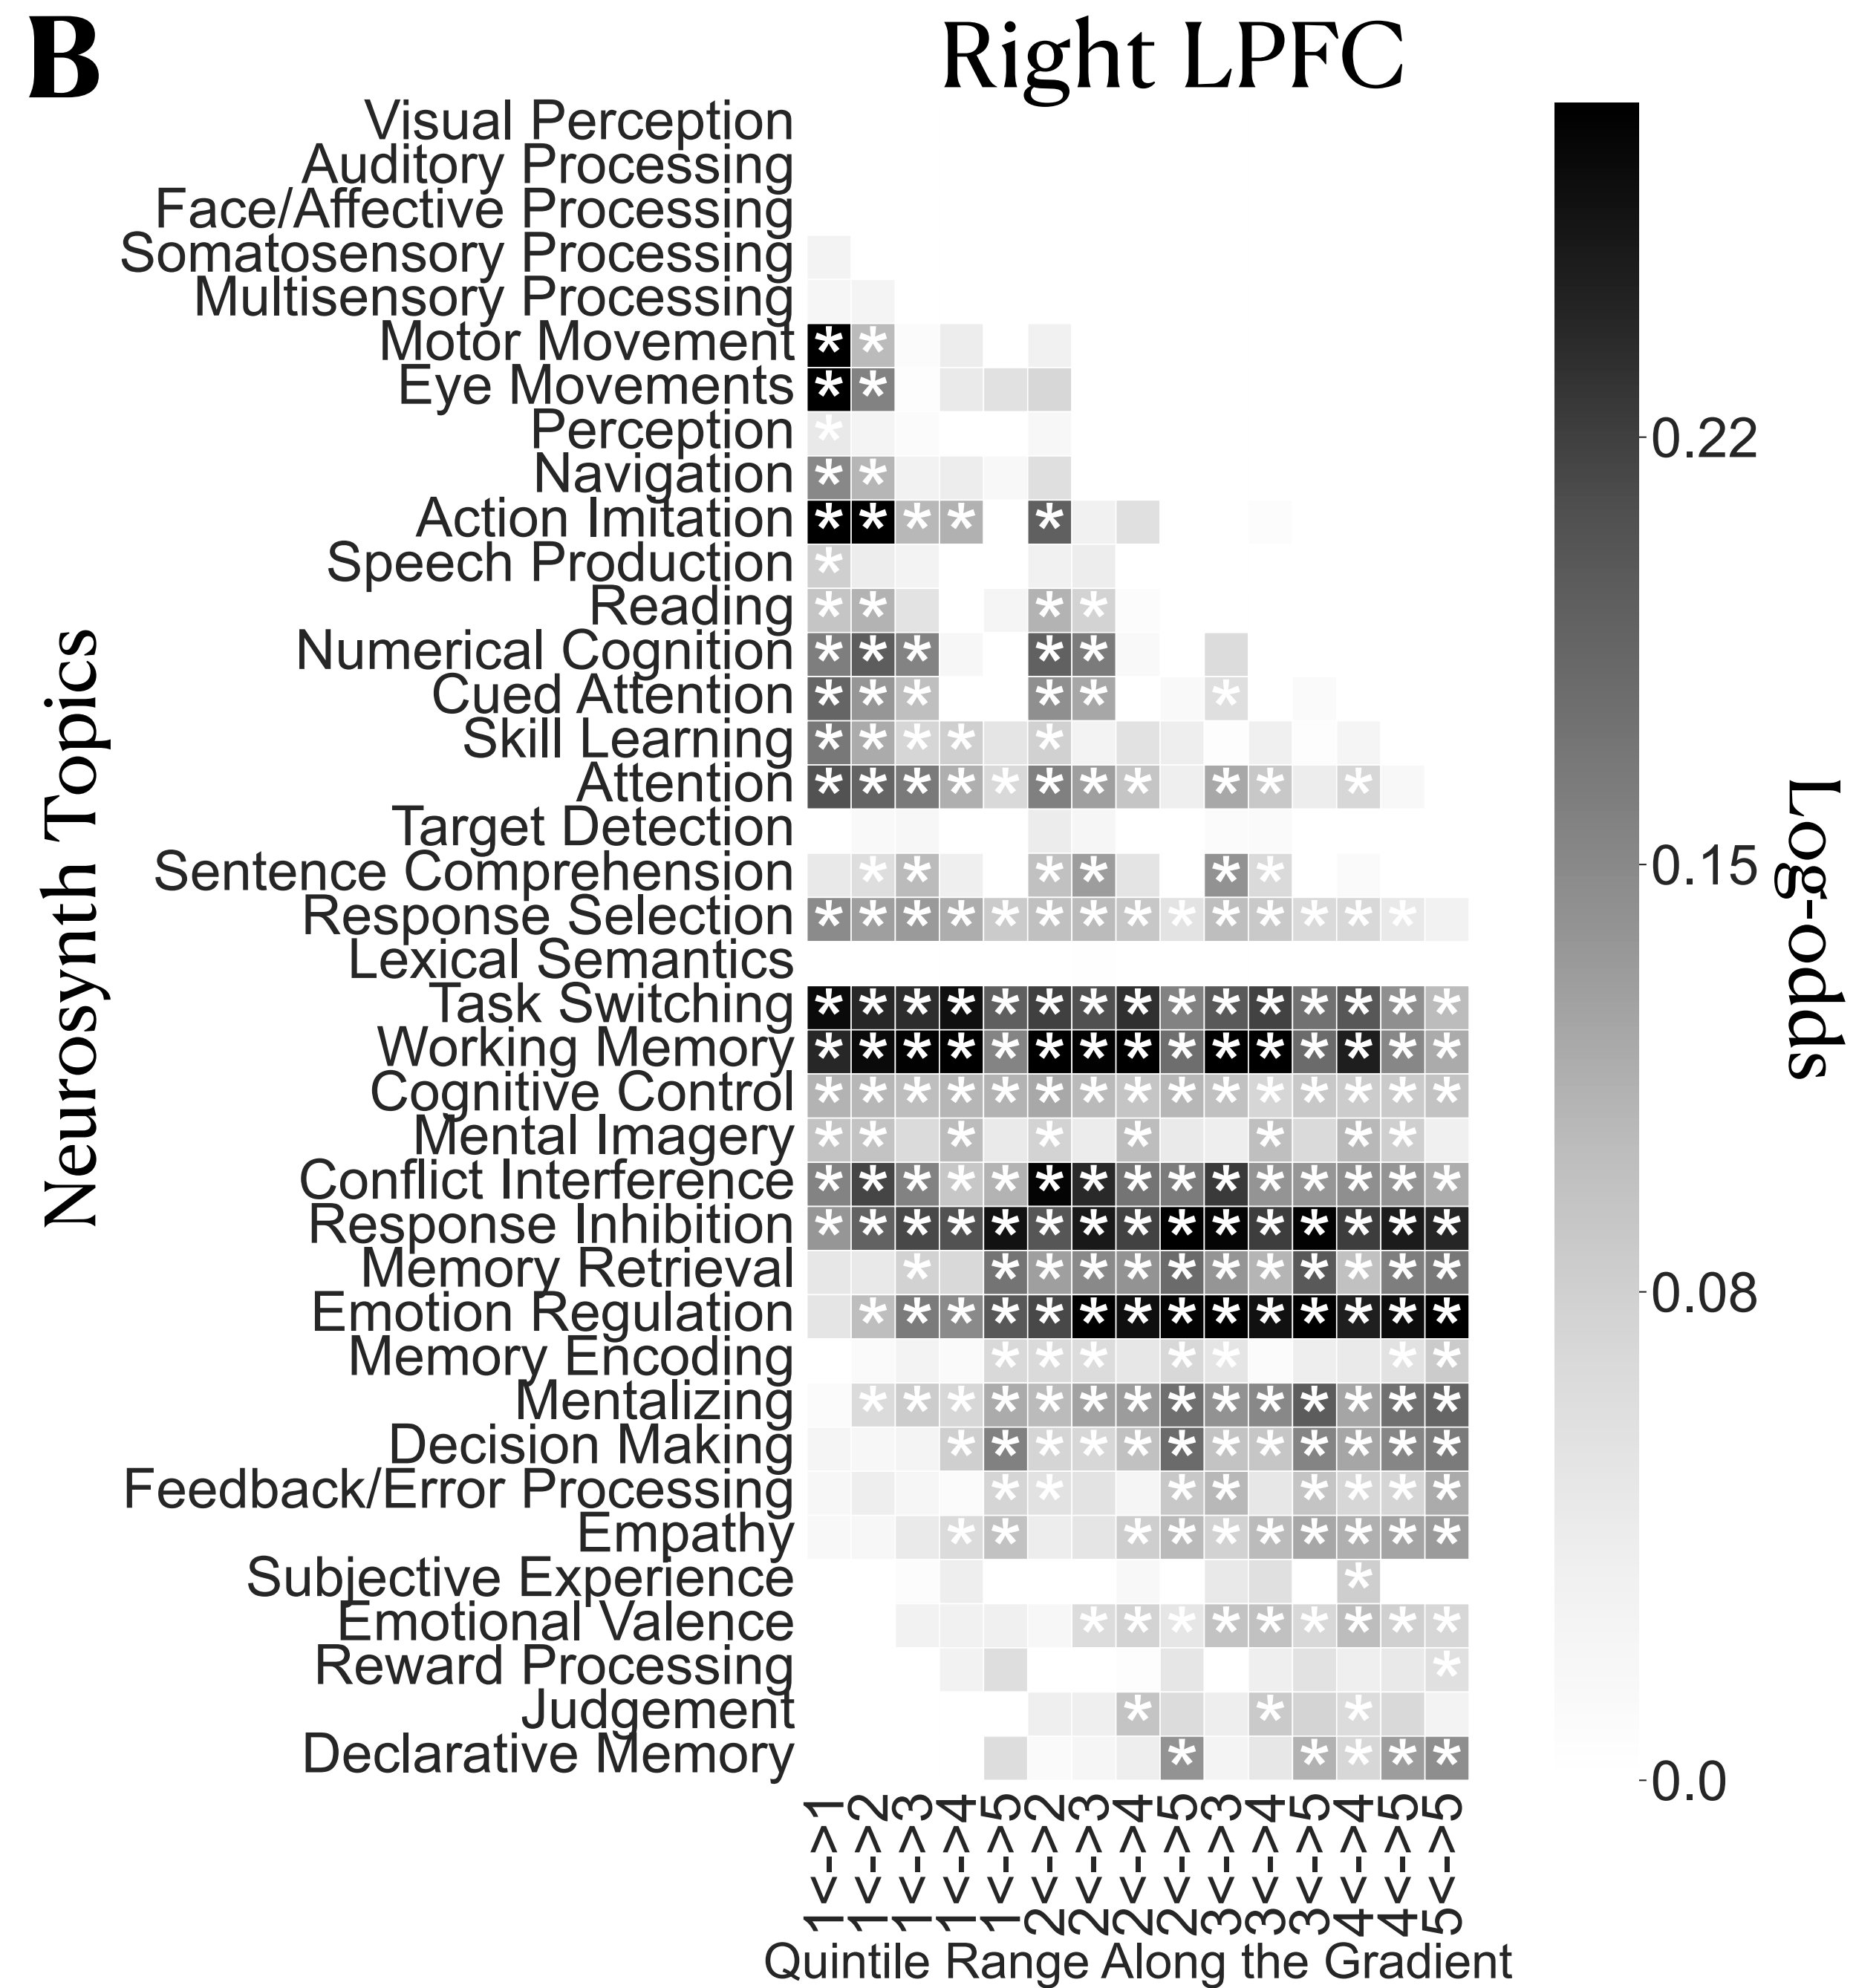

Supplement: supp [file elife-76926-supp-v1.zip]
